# Supplementary material for: Steric effects on the control of endo/exo-selectivity in the asymmetric cycloaddition reaction of 3,4-dimethyl-1-phenylarsole
Source: Royal Society of Chemistry journal article supplement (doi:10.1039/b924613d), 2010-01-01
Supplement: b924613d.pdf [file b924613d.pdf]

## **Steric effects on control of endo/exo-selectivity in asymmetric cycloaddition reaction of 3,4-dimethyl-1-phenylarsole**

Mengtao Ma, Ruifeng Lu, Sumod A. Pullarkat, Weiqiao Deng\* and Pak-Hing Leung\*

Division of Chemistry and Biological Chemistry, School of Physical and Mathematical Sciences, Nanyang Technological University, Singapore 637371, Singapore

Email: [pakhing@ntu.edu.sg](mailto:pakhing@ntu.edu.sg); [wqdeng@ntu.edu.sg](mailto:wqdeng@ntu.edu.sg)

### **Supporting information**

- 16 M. J. Frisch, G. W. Trucks, H. B. Schlegel, G. E. Scuseria, M. A. Robb, J. R. Cheeseman, J. A. Jr. Montgomery, T. Vreven, K. N. Kudin, J. C. Burant, J. M. Millam, S. S. Iyengar, J. Tomasi, V. Barone, B. Mennucci, M. Cossi, G. Scalmani, N. Rega, G. A. Petersson, H. Nakatsuji, M. Hada, M. Ehara, K. Toyota, R. Fukuda, J. Hasegawa, M. Ishida, T. Nakajima, Y. Honda, O. Kitao, H. Nakai, M. Klene, X. Li, J. E. Knox, H. P. Hratchian, J. B. Cross, C. Adamo, J. Jaramillo, R. Gomperts, R. E. Stratmann, O. Yazyev, A. J. Austin, R. Cammi, C. Pomelli, J. W. Ochterski, P. Y. Ayala, K. Morokuma, G. A. Voth, P. Salvador, J. J. Dannenberg, V. G. Zakrzewski, S. Dapprich, A. D. Daniels, M. C. Strain, O. Farkas, D. K. Malick, A. D. Rabuck, K. Raghavachari, J. B. Foresman, J. V. Ortiz, Q. Cui, A. G. Baboul, S. Clifford, J. Cioslowski, B. B. Stefanov, G. Liu, A. Liashenko, P. Piskorz, I. Komaromi, R. L. Martin, D. J. Fox, T. Keith, M. A. Al-Laham, C. Y. Peng, A. Nanayakkara, M. Challacombe, P. M. W. Gill, B. Johnson, W. Chen, M. W. Wong, C. Gonzalez and J. A. Pople, *Gaussian 03*, revision B.05, Gaussian Inc., Pittsburgh PA, 2003.

**Table S1** Selected bond lengths (Å) and angles (deg) for *endo*-(–)-7

|             | Exp. data | Calc. data |             | Exp. data | Calc. data |
|-------------|-----------|------------|-------------|-----------|------------|
| Pd1–C1      | 2.042(2)  | 2.056      | Pd1–N1      | 2.114(2)  | 2.191      |
| Pd1–P1      | 2.253(1)  | 2.360      | Pd1–As1     | 2.472(1)  | 2.547      |
| As1–C35     | 1.986(2)  | 2.013      | As1–C40     | 1.978(2)  | 2.003      |
| As1–C41     | 1.930(2)  | 1.937      | P1–C27      | 1.844(2)  | 1.886      |
| P1–C15      | 1.823(2)  | 1.837      | P1–C21      | 1.817(2)  | 1.835      |
| C27–C28     | 1.571(3)  | 1.576      | C28–C29     | 1.517(3)  | 1.522      |
| C28–C35     | 1.569(3)  | 1.577      | C35–C36     | 1.517(3)  | 1.521      |
| C36–C38     | 1.341(3)  | 1.349      | C36–C37     | 1.495(3)  | 1.500      |
| C38–C39     | 1.494(3)  | 1.500      | C38–C40     | 1.509(3)  | 1.520      |
| C27–C40     | 1.564(3)  | 1.565      |             |           |            |
|             |           |            |             |           |            |
| C1–Pd1–N1   | 81.6(1)   | 79.9       | C1–Pd1–P1   | 94.6(1)   | 97.0       |
| N1–Pd1–P1   | 175.9(1)  | 174.1      | C1–Pd1–As1  | 172.2(1)  | 173.5      |
| N1–Pd1–As1  | 99.9(1)   | 101.2      | P1–Pd1–As1  | 83.6(1)   | 82.4       |
| C40–As1–C35 | 76.6(1)   | 75.4       | C41–As1–C40 | 106.5(1)  | 109.0      |
| C41–As1–C35 | 106.2(1)  | 108.8      | C41–As1–Pd1 | 129.2(1)  | 126.5      |
| C40–As1–Pd1 | 101.2(1)  | 102.6      | C35–As1–Pd1 | 121.4(1)  | 120.5      |
| C21–P1–C15  | 109.8(1)  | 108.0      | C21–P1–C27  | 104.3(1)  | 104.7      |
| C15–P1–C27  | 105.1(1)  | 104.2      | C21–P1–Pd1  | 114.7(1)  | 117.2      |
| C15–P1–Pd1  | 114.3(1)  | 115.0      | C27–P1–Pd1  | 107.6(1)  | 106.4      |
| C40–C27–C28 | 107.5(2)  | 107.0      | C35–C28–C27 | 105.4(2)  | 105.3      |
| C35–C28–C29 | 114.4(2)  | 112.6      | C27–C28–C29 | 115.0(2)  | 116.1      |
| C36–C35–C28 | 110.3(2)  | 109.3      | C28–C35–As1 | 97.2(1)   | 98.6       |
| C36–C35–As1 | 101.9(1)  | 102.4      | C38–C36–C35 | 111.3(2)  | 111.1      |
| C36–C38–C40 | 112.0(2)  | 111.6      | C38–C40–C27 | 109.5(2)  | 110.5      |
| C38–C40–As1 | 103.0(1)  | 103.2      | C27–C40–As1 | 95.6(1)   | 96.3       |

Cartesian coordinates of complexes calculated at the UB3LYP/6-31G\*/ LANL2DZ(Pd) level.

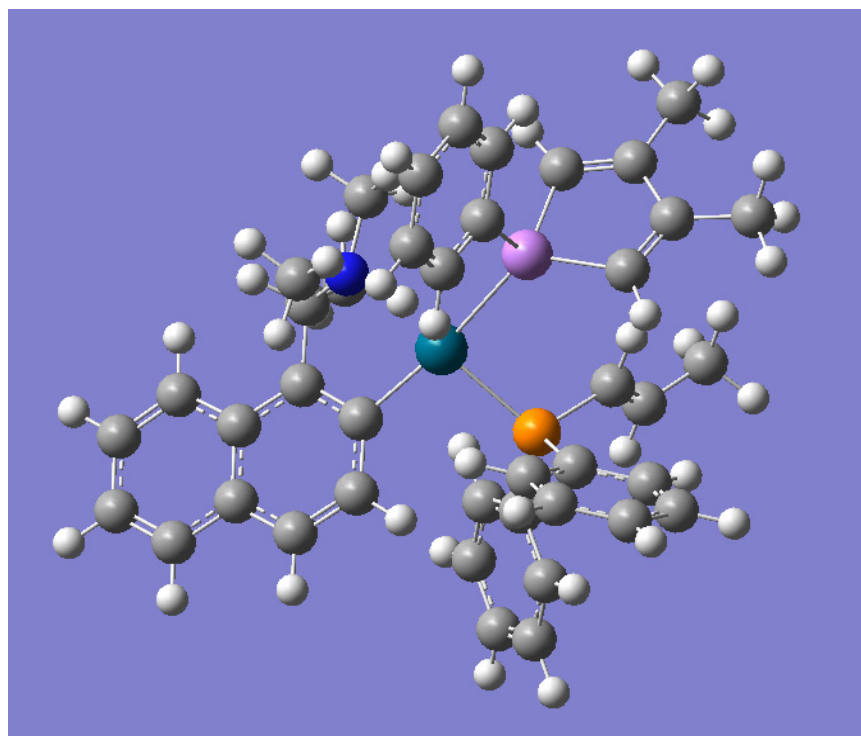

Optimized Structure of *trans*-Me-2

Gas phase energy: -4344.92639799 hartrees

Solvation (CH<sub>2</sub>Cl<sub>2</sub>) energy: -4344.97642209 hartrees

Gibbs free energy: -4344.268342 hartrees

|    |             |             |             |
|----|-------------|-------------|-------------|
| Pd | 0.28082000  | -0.46734900 | -0.17314500 |
| As | -2.32724700 | -0.75683600 | -0.30522600 |
| C  | 2.28129000  | -0.55114300 | 0.22837500  |
| C  | 2.96453200  | 0.20673300  | 1.21224900  |
| H  | 2.45626000  | 0.99104800  | 1.76235800  |
| C  | 4.29082400  | -0.04100600 | 1.48926800  |
| H  | 4.80403400  | 0.53969600  | 2.25235900  |
| C  | 5.01499800  | -1.03690900 | 0.78562000  |
| C  | 4.33387900  | -1.82930700 | -0.19839100 |
| C  | 2.94230900  | -1.57882000 | -0.43283800 |
| C  | 6.39260600  | -1.27236500 | 1.04166800  |
| H  | 6.89274300  | -0.66495600 | 1.79194000  |
| C  | 7.08446100  | -2.24445900 | 0.35650500  |
| H  | 8.13772900  | -2.41462400 | 0.55916300  |
| C  | 6.41997800  | -3.02595600 | -0.61812500 |
| H  | 6.97021300  | -3.78966400 | -1.16054600 |
| C  | 5.08360300  | -2.82600600 | -0.88782400 |

|   |             |             |             |
|---|-------------|-------------|-------------|
| H | 4.60777900  | -3.43445000 | -1.65036000 |
| C | 2.12016600  | -2.44060800 | -1.36619400 |
| H | 2.53195800  | -3.45792500 | -1.42553800 |
| C | 2.07651100  | -1.85750400 | -2.78634200 |
| H | 1.61226300  | -2.53481400 | -3.50960200 |
| H | 3.10317900  | -1.67406100 | -3.11717700 |
| H | 1.54432000  | -0.89956100 | -2.79879200 |
| C | 0.83930400  | -3.44146700 | 0.47021700  |
| H | -0.12920900 | -3.46730600 | 0.97196600  |
| H | 1.58996200  | -3.04539600 | 1.15271900  |
| H | 1.12004400  | -4.46371200 | 0.17849100  |
| C | -0.21903200 | -3.20420100 | -1.66869100 |
| H | 0.17698600  | -4.15890200 | -2.04480500 |
| H | -0.42384700 | -2.54487900 | -2.51168400 |
| H | -1.15010900 | -3.40736400 | -1.13519500 |
| C | -0.69640500 | 2.40935700  | 1.53810800  |
| C | -1.49250600 | 3.56572100  | 1.57134200  |
| H | -1.62729300 | 4.15708800  | 0.67042000  |
| C | -2.11368400 | 3.95678000  | 2.75902100  |
| H | -2.72870300 | 4.85206400  | 2.77578700  |
| C | -1.94349300 | 3.20159000  | 3.92189000  |
| H | -2.42736000 | 3.50846100  | 4.84462600  |
| C | -1.15176600 | 2.05091500  | 3.89703900  |
| H | -1.01716700 | 1.46202500  | 4.79979900  |
| C | -0.53469600 | 1.65303700  | 2.71032800  |
| H | 0.07431900  | 0.75283500  | 2.69121700  |
| C | 1.68596300  | 2.86967700  | -0.12339200 |
| C | 2.60802200  | 2.56638700  | -1.13938900 |
| H | 2.43177800  | 1.72070200  | -1.79749500 |
| C | 3.76011100  | 3.33443200  | -1.29619200 |
| H | 4.46650000  | 3.09118800  | -2.08455400 |
| C | 4.01251700  | 4.40337800  | -0.43165800 |
| H | 4.91543500  | 4.99564100  | -0.54887800 |
| C | 3.10568400  | 4.70474700  | 0.58476000  |
| H | 3.29870800  | 5.53251700  | 1.26104300  |
| C | 1.94336800  | 3.94518900  | 0.73918700  |
| H | 1.24528800  | 4.19398500  | 1.53167400  |
| C | -0.89802500 | 2.49894200  | -1.35339600 |
| H | -1.88848100 | 2.04877700  | -1.39775300 |
| C | -0.54280000 | 3.41718500  | -2.26410000 |
| H | 0.44735800  | 3.86723000  | -2.21499300 |
| C | -3.23272400 | -1.12088700 | -1.96830900 |
| H | -2.92731200 | -1.87104800 | -2.68808400 |
| C | -4.25859700 | -0.26302600 | -2.16194000 |

|   |             |             |             |
|---|-------------|-------------|-------------|
| C | -5.11781800 | -0.24985000 | -3.39787700 |
| H | -6.17332800 | -0.41527000 | -3.14897700 |
| H | -4.81005000 | -1.02527700 | -4.10411700 |
| H | -5.06313700 | 0.71842600  | -3.91124600 |
| C | -4.50742600 | 0.70565500  | -1.05042300 |
| C | -5.65127200 | 1.68227500  | -1.12256000 |
| H | -5.68093900 | 2.32133500  | -0.23628000 |
| H | -6.61386500 | 1.16089000  | -1.19582400 |
| H | -5.57372300 | 2.32770700  | -2.00655400 |
| C | -3.65536900 | 0.61910700  | -0.00702100 |
| H | -3.69981500 | 1.23836500  | 0.88107400  |
| C | -2.92543000 | -2.16116800 | 0.91905700  |
| C | -3.99827800 | -3.00371800 | 0.60212400  |
| H | -4.50649500 | -2.90240800 | -0.35157900 |
| C | -4.41908700 | -3.97203900 | 1.51540300  |
| H | -5.24952600 | -4.62501500 | 1.26205400  |
| C | -3.77976500 | -4.09922300 | 2.75081900  |
| H | -4.11087900 | -4.85258400 | 3.45964600  |
| C | -2.71460200 | -3.25615900 | 3.07359300  |
| H | -2.21643000 | -3.34813300 | 4.03464800  |
| C | -2.28497100 | -2.29188900 | 2.15869200  |
| H | -1.45375900 | -1.63934000 | 2.41437700  |
| N | 0.74400900  | -2.57342800 | -0.73646500 |
| P | 0.14889800  | 1.87340200  | -0.00034700 |
| C | -1.42172100 | 3.88894200  | -3.38429200 |
| H | -1.56418700 | 4.97601400  | -3.33135400 |
| H | -0.95065100 | 3.68507900  | -4.35486300 |
| H | -2.40462800 | 3.40822000  | -3.36939800 |

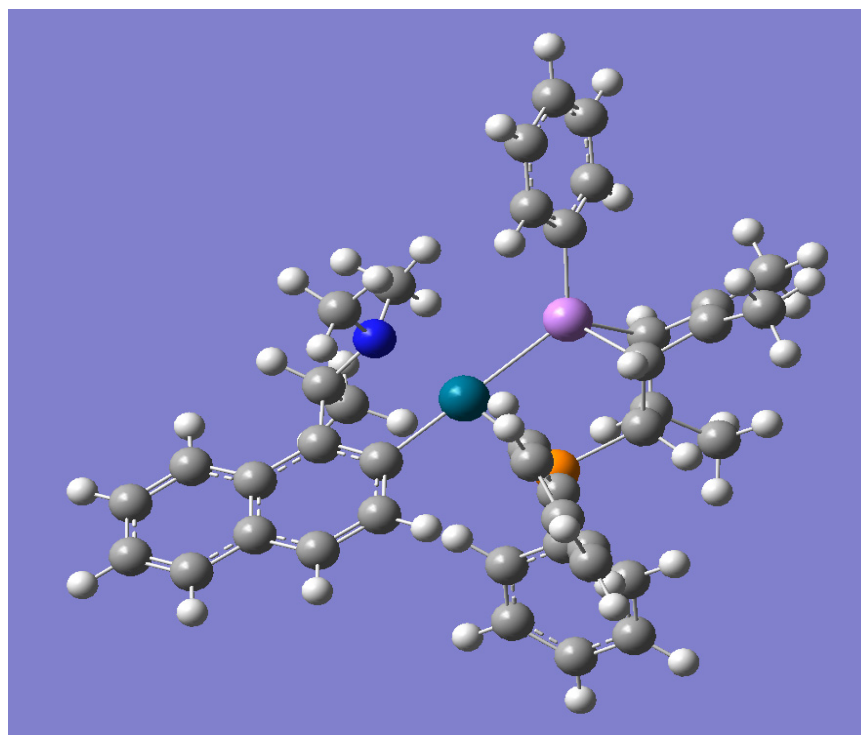

Optimized Structure of *endo*(-)-2

Gas phase energy: -4344.95125703 hartrees

Solvation (CH<sub>2</sub>Cl<sub>2</sub>) energy: -4345.00385257 hartrees

Gibbs free energy: -4344.282160 hartrees

|    |             |             |             |
|----|-------------|-------------|-------------|
| Pd | 0.42897100  | -0.59407100 | -0.09162800 |
| As | -2.10923200 | -0.73950100 | -0.25626900 |
| C  | 2.45541700  | -0.46464800 | 0.22783200  |
| C  | 3.14201500  | 0.51390000  | 0.99178300  |
| H  | 2.60440200  | 1.34423400  | 1.43609800  |
| C  | 4.50121900  | 0.42194800  | 1.19461900  |
| H  | 5.01604000  | 1.17624000  | 1.78550900  |
| C  | 5.25594800  | -0.64338600 | 0.64111900  |
| C  | 4.58114100  | -1.65141700 | -0.12664900 |
| C  | 3.16264400  | -1.53978500 | -0.30329400 |
| C  | 6.66043600  | -0.73456700 | 0.83552600  |
| H  | 7.15459100  | 0.03591700  | 1.42214600  |
| C  | 7.38468300  | -1.77160600 | 0.29457700  |
| H  | 8.45803700  | -1.83089200 | 0.44882500  |
| C  | 6.72706200  | -2.76559700 | -0.46821300 |
| H  | 7.30229600  | -3.58106200 | -0.89754300 |
| C  | 5.36579400  | -2.70802800 | -0.67383200 |
| H  | 4.89509700  | -3.48101500 | -1.27264800 |
| C  | 2.37755100  | -2.57471900 | -1.08259200 |
| H  | 2.83747700  | -3.56937800 | -0.99816600 |

|   |             |             |             |
|---|-------------|-------------|-------------|
| C | 2.30460400  | -2.20218700 | -2.57112000 |
| H | 1.87065900  | -2.99496500 | -3.18778700 |
| H | 3.32040500  | -2.01908700 | -2.93334800 |
| H | 1.72925300  | -1.27995700 | -2.71071100 |
| C | 1.13296300  | -3.37408100 | 0.87482000  |
| H | 0.16208300  | -3.37518400 | 1.37515300  |
| H | 1.86216900  | -2.85783100 | 1.49791400  |
| H | 1.45530200  | -4.41425200 | 0.72376900  |
| C | 0.06360300  | -3.46131200 | -1.27395600 |
| H | 0.49020600  | -4.44471100 | -1.51943600 |
| H | -0.16185300 | -2.92719100 | -2.19631400 |
| H | -0.86295200 | -3.61151000 | -0.71724900 |
| C | 0.17580200  | 2.33361800  | 1.85906700  |
| C | 0.44697800  | 3.68024400  | 2.15071000  |
| H | 0.60112000  | 4.39651700  | 1.35125300  |
| C | 0.54563700  | 4.10748100  | 3.47587600  |
| H | 0.76099400  | 5.15080800  | 3.68747700  |
| C | 0.37704900  | 3.20019500  | 4.52334400  |
| H | 0.45728800  | 3.53644100  | 5.55294300  |
| C | 0.12172700  | 1.85597400  | 4.24387800  |
| H | 0.00919400  | 1.14138800  | 5.05414100  |
| C | 0.02976700  | 1.42329400  | 2.92122000  |
| H | -0.13018200 | 0.36958700  | 2.70830500  |
| C | 0.81828300  | 2.86443500  | -0.99812900 |
| C | 1.96410800  | 2.45170100  | -1.69566700 |
| H | 2.35272100  | 1.45008700  | -1.54848200 |
| C | 2.61114500  | 3.32677600  | -2.57077200 |
| H | 3.49855600  | 2.99437600  | -3.10143900 |
| C | 2.12215100  | 4.61895100  | -2.76332100 |
| H | 2.62692800  | 5.29750800  | -3.44477400 |
| C | 0.97759600  | 5.03811500  | -2.08044900 |
| H | 0.58872500  | 6.04126900  | -2.22942800 |
| C | 0.32676000  | 4.16788700  | -1.20625200 |
| H | -0.56565600 | 4.51218900  | -0.69232500 |
| C | -1.85803100 | 1.92172400  | -0.25414900 |
| H | -2.13732000 | 2.96042700  | -0.04743700 |
| C | -2.14061800 | 1.54184900  | -1.76100900 |
| H | -1.20265900 | 1.26349500  | -2.25756700 |
| C | -3.05762100 | 0.27126000  | -1.71165400 |
| H | -3.14597000 | -0.21874500 | -2.68307500 |
| C | -4.37779900 | 0.64416300  | -1.04967700 |
| C | -5.65334100 | 0.61939100  | -1.84003000 |
| H | -6.51879600 | 0.90361900  | -1.23593600 |
| H | -5.84653700 | -0.38181200 | -2.24804800 |

|   |             |             |             |
|---|-------------|-------------|-------------|
| H | -5.60546100 | 1.30281300  | -2.69822800 |
| C | -4.18482300 | 1.04974300  | 0.22237900  |
| C | -5.18909300 | 1.57596100  | 1.20452200  |
| H | -4.94689200 | 2.60289700  | 1.51090000  |
| H | -5.19701100 | 0.96894700  | 2.11982400  |
| H | -6.20380600 | 1.58184500  | 0.79848300  |
| C | -2.72042200 | 0.95731100  | 0.62298900  |
| H | -2.53431300 | 1.05853300  | 1.69251900  |
| C | -3.23789900 | -2.20455100 | 0.32052600  |
| C | -4.19826800 | -2.77501600 | -0.52480100 |
| H | -4.36231700 | -2.37274700 | -1.51970800 |
| C | -4.95480300 | -3.86563700 | -0.09122400 |
| H | -5.70019700 | -4.30032700 | -0.75098600 |
| C | -4.75587000 | -4.39383000 | 1.18593200  |
| H | -5.34704800 | -5.24061500 | 1.52195600  |
| C | -3.79301700 | -3.83519100 | 2.03016900  |
| H | -3.63504500 | -4.24367000 | 3.02419400  |
| C | -3.02989900 | -2.75038900 | 1.59617000  |
| H | -2.28119600 | -2.32316700 | 2.25977800  |
| N | 1.00780900  | -2.68075000 | -0.43757300 |
| P | -0.02820000 | 1.70388700  | 0.14287700  |
| C | -2.76167500 | 2.69083400  | -2.56473900 |
| H | -3.68865600 | 3.04809500  | -2.10466500 |
| H | -2.06547100 | 3.53314900  | -2.62905100 |
| H | -2.98730700 | 2.37062200  | -3.58842100 |



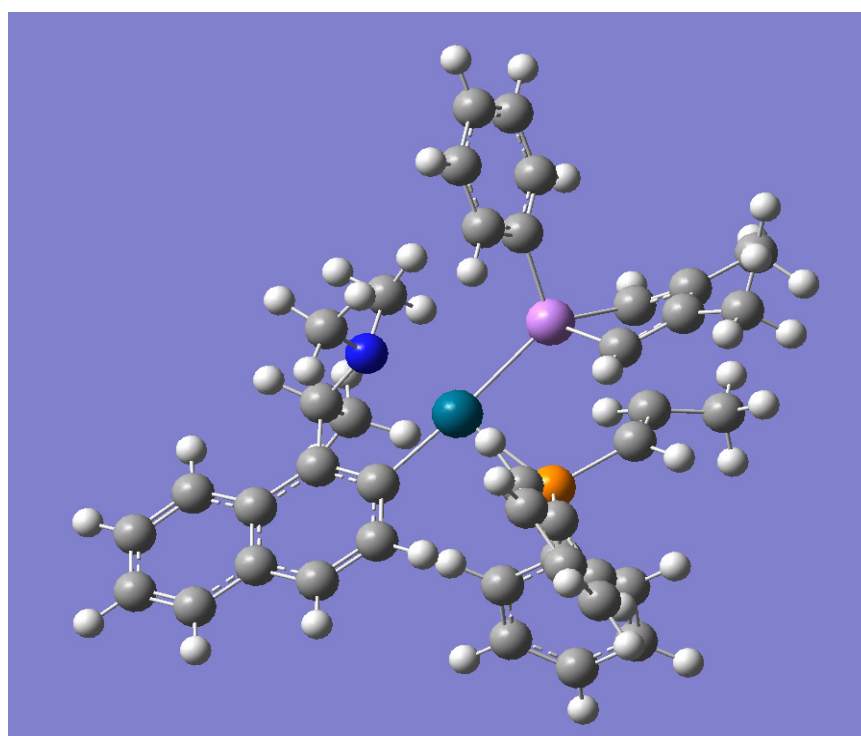

Transition state structure for TS-*trans*-Me

Imaginary frequencies:  $-452.9106 \text{ cm}^{-1}$

Gas phase energy:  $-4344.88079528 \text{ hartrees}$

Solvation ( $\text{CH}_2\text{Cl}_2$ ) energy:  $-4344.93333816 \text{ hartrees}$

Gibbs free energy:  $-4344.218083 \text{ hartrees}$

|    |             |             |             |
|----|-------------|-------------|-------------|
| Pd | 0.39096400  | -0.51252700 | -0.17609800 |
| As | -2.16614600 | -0.66448500 | -0.22270400 |
| C  | 2.40030700  | -0.48382200 | 0.23792800  |
| C  | 3.06746200  | 0.40361600  | 1.12129900  |
| H  | 2.53366600  | 1.22503700  | 1.58603300  |
| C  | 4.40368900  | 0.23341500  | 1.41049000  |
| H  | 4.90407500  | 0.91717500  | 2.09253500  |
| C  | 5.15342600  | -0.81972800 | 0.82771900  |
| C  | 4.49530700  | -1.73662700 | -0.05953400 |
| C  | 3.09839600  | -1.54927400 | -0.32155300 |
| C  | 6.53634800  | -0.98742800 | 1.10745600  |
| H  | 7.01836900  | -0.28578500 | 1.78371100  |
| C  | 7.25529400  | -2.01209500 | 0.53664600  |
| H  | 8.31221300  | -2.13014200 | 0.75662500  |
| C  | 6.61426300  | -2.91604500 | -0.34339700 |
| H  | 7.18603700  | -3.72117000 | -0.79622900 |
| C  | 5.27395700  | -2.78318800 | -0.63388800 |
| H  | 4.81622100  | -3.48607400 | -1.32245500 |

|   |             |             |             |
|---|-------------|-------------|-------------|
| C | 2.32201200  | -2.49233700 | -1.21520600 |
| H | 2.74723000  | -3.50539200 | -1.18906100 |
| C | 2.33402000  | -2.00281800 | -2.67125400 |
| H | 1.90244900  | -2.72752800 | -3.36807200 |
| H | 3.37274000  | -1.83414200 | -2.97039500 |
| H | 1.80185400  | -1.04946400 | -2.76423700 |
| C | 0.96528900  | -3.40284300 | 0.61465300  |
| H | -0.02929700 | -3.41726300 | 1.06504500  |
| H | 1.67487800  | -2.95806600 | 1.31154500  |
| H | 1.27157200  | -4.43569800 | 0.39489800  |
| C | -0.00309100 | -3.27868600 | -1.58094400 |
| H | 0.40755900  | -4.24952200 | -1.89477100 |
| H | -0.16996600 | -2.65924400 | -2.46193800 |
| H | -0.95688500 | -3.45147300 | -1.08027400 |
| C | 0.15517000  | 2.45960300  | 1.72305100  |
| C | 0.36520100  | 3.82289400  | 1.98277600  |
| H | 0.51265200  | 4.52105600  | 1.16524500  |
| C | 0.40669500  | 4.29017100  | 3.29755500  |
| H | 0.57327500  | 5.34677100  | 3.48624200  |
| C | 0.24444600  | 3.40480200  | 4.36479000  |
| H | 0.28224400  | 3.77145200  | 5.38647000  |
| C | 0.04905900  | 2.04431800  | 4.11646300  |
| H | -0.05890300 | 1.34824600  | 4.94341700  |
| C | 0.01033800  | 1.57331500  | 2.80392200  |
| H | -0.10877400 | 0.50960900  | 2.61310200  |
| C | 1.03482600  | 2.89684400  | -1.07355600 |
| C | 2.29760800  | 2.49786300  | -1.53494700 |
| H | 2.69433100  | 1.52899200  | -1.25711900 |
| C | 3.04948500  | 3.34366200  | -2.35356200 |
| H | 4.02590500  | 3.02038700  | -2.70284300 |
| C | 2.55050000  | 4.59236500  | -2.72428300 |
| H | 3.13674900  | 5.24726800  | -3.36239700 |
| C | 1.28894700  | 4.99512800  | -2.27906000 |
| H | 0.89016700  | 5.96291000  | -2.56966000 |
| C | 0.53273800  | 4.15261300  | -1.46490000 |
| H | -0.45341100 | 4.47313400  | -1.14272700 |
| C | -1.69392600 | 2.15984200  | -0.49191300 |
| H | -2.16670700 | 3.00564700  | 0.00080000  |
| C | -2.12606800 | 1.80154900  | -1.78661200 |
| H | -1.40983400 | 1.25517600  | -2.40106300 |
| C | -3.37732600 | 0.09052600  | -1.55183900 |
| H | -3.45664600 | -0.30160400 | -2.56196200 |
| C | -4.50656700 | 0.59524300  | -0.88365200 |
| C | -5.81060900 | 0.88383800  | -1.57922000 |

|   |             |             |             |
|---|-------------|-------------|-------------|
| H | -6.63727300 | 0.35950700  | -1.08298500 |
| H | -5.79043400 | 0.56368600  | -2.62430400 |
| H | -6.05951900 | 1.95279300  | -1.55709400 |
| C | -4.26509300 | 0.97040200  | 0.46709400  |
| C | -5.27251000 | 1.73591600  | 1.28738500  |
| H | -5.55869900 | 2.68171700  | 0.80928500  |
| H | -4.88370900 | 1.96494700  | 2.28316700  |
| H | -6.19447800 | 1.15495200  | 1.41500200  |
| C | -2.97659300 | 0.68949700  | 0.90984100  |
| H | -2.63856500 | 0.91541900  | 1.91507900  |
| C | -3.06520800 | -2.30511300 | 0.35767400  |
| C | -3.91942400 | -3.03188800 | -0.48198900 |
| H | -4.14443000 | -2.67279200 | -1.48174400 |
| C | -4.50078200 | -4.22123900 | -0.03520400 |
| H | -5.16590300 | -4.77443700 | -0.69229900 |
| C | -4.23274600 | -4.69501900 | 1.25031500  |
| H | -4.68842200 | -5.61813600 | 1.59625100  |
| C | -3.37662400 | -3.97932300 | 2.09074900  |
| H | -3.16686400 | -4.34103600 | 3.09338300  |
| C | -2.79012900 | -2.79407800 | 1.64373700  |
| H | -2.12811100 | -2.24396000 | 2.30924400  |
| N | 0.92148500  | -2.60277400 | -0.63999200 |
| P | 0.02328600  | 1.79986000  | 0.01129500  |
| C | -3.01789000 | 2.74206900  | -2.57030900 |
| H | -3.78886600 | 3.18956200  | -1.93469000 |
| H | -2.41311800 | 3.56234700  | -2.97919000 |
| H | -3.50881900 | 2.24423100  | -3.41210300 |

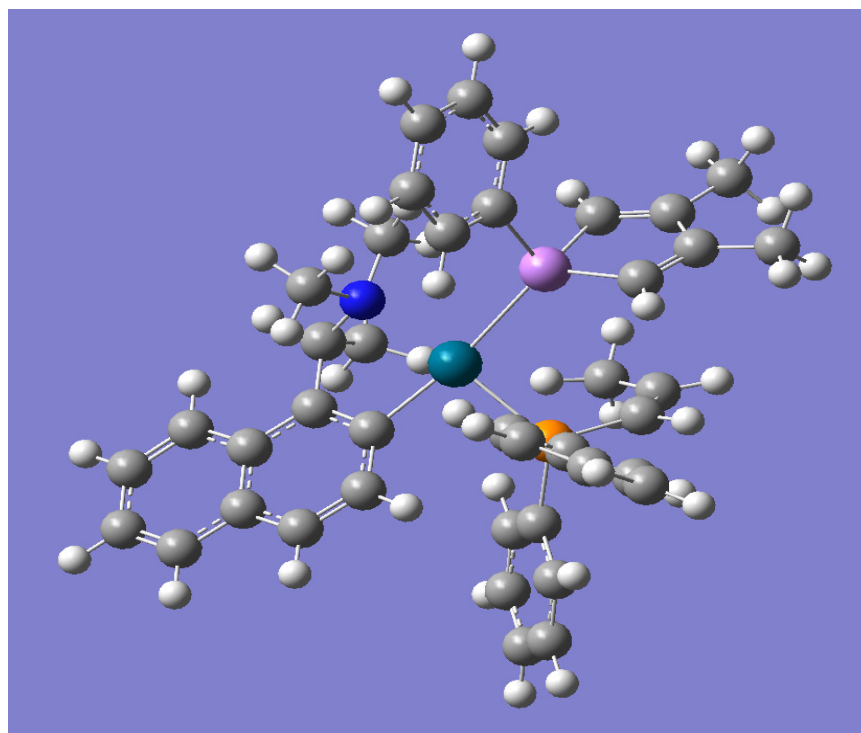

Optimized Structure of *cis*-Me-2

Gas phase energy: -4344.91780673 hartrees

Solvation (CH<sub>2</sub>Cl<sub>2</sub>) energy: -4344.97070738 hartrees

Gibbs free energy: -4344.258424 hartrees

|    |             |             |             |
|----|-------------|-------------|-------------|
| Pd | 0.26112700  | -0.42086100 | -0.15577700 |
| As | -2.36467900 | -0.60309900 | -0.29736500 |
| C  | 2.26298900  | -0.51981000 | 0.25057700  |
| C  | 2.97510200  | 0.34261300  | 1.12135600  |
| H  | 2.49247800  | 1.20478700  | 1.56735300  |
| C  | 4.29700900  | 0.09877900  | 1.42111300  |
| H  | 4.83266300  | 0.76288100  | 2.09552500  |
| C  | 4.98711100  | -1.00383300 | 0.85639300  |
| C  | 4.27681600  | -1.90121000 | -0.00935900 |
| C  | 2.89156600  | -1.64324300 | -0.27298200 |
| C  | 6.35904300  | -1.24305700 | 1.13778300  |
| H  | 6.88193700  | -0.55468000 | 1.79706300  |
| C  | 7.01737200  | -2.31951500 | 0.58932600  |
| H  | 8.06658500  | -2.49199200 | 0.81025100  |
| C  | 6.32379000  | -3.20613500 | -0.26807100 |
| H  | 6.84768100  | -4.05290600 | -0.70249400 |
| C  | 4.99217600  | -3.00431300 | -0.55924500 |
| H  | 4.49294300  | -3.69598800 | -1.23028200 |
| C  | 2.05002900  | -2.58901700 | -1.10074400 |
| H  | 2.41748800  | -3.62107800 | -1.01121900 |

|   |             |             |             |
|---|-------------|-------------|-------------|
| C | 2.06884500  | -2.20639500 | -2.58709300 |
| H | 1.57674400  | -2.94750600 | -3.22412100 |
| H | 3.11121500  | -2.13127700 | -2.91070000 |
| H | 1.60123400  | -1.22894700 | -2.74474400 |
| C | 0.69109000  | -3.30736500 | 0.80560500  |
| H | -0.28839600 | -3.24210100 | 1.28168100  |
| H | 1.44195500  | -2.86049400 | 1.45596200  |
| H | 0.93915000  | -4.36587900 | 0.64121400  |
| C | -0.31792800 | -3.27443500 | -1.37167600 |
| H | 0.04078300  | -4.28245600 | -1.62631200 |
| H | -0.47585100 | -2.70942200 | -2.29019500 |
| H | -1.26620000 | -3.37333100 | -0.83996000 |
| C | -0.52894700 | 2.51933600  | 1.50707700  |
| C | -1.09803400 | 3.79594900  | 1.66246200  |
| H | -1.14915500 | 4.48450400  | 0.82418400  |
| C | -1.59280600 | 4.20328200  | 2.90201000  |
| H | -2.02990700 | 5.19203000  | 3.00731900  |
| C | -1.52132800 | 3.34683000  | 4.00338500  |
| H | -1.90622000 | 3.66735100  | 4.96706800  |
| C | -0.95193800 | 2.08038100  | 3.86247600  |
| H | -0.89005900 | 1.41178300  | 4.71627300  |
| C | -0.46115300 | 1.66831400  | 2.62206300  |
| H | -0.02184200 | 0.68001600  | 2.51367900  |
| C | 1.68351200  | 2.90397200  | -0.40444600 |
| C | 2.51164500  | 2.52968400  | -1.47509200 |
| H | 2.28262800  | 1.64363200  | -2.05772100 |
| C | 3.65002300  | 3.27270100  | -1.78007400 |
| H | 4.28319300  | 2.97072600  | -2.60940300 |
| C | 3.98394000  | 4.39178300  | -1.01272400 |
| H | 4.87481900  | 4.96700300  | -1.24747600 |
| C | 3.17473800  | 4.76092300  | 0.06131200  |
| H | 3.43258200  | 5.62391400  | 0.66851600  |
| C | 2.02814600  | 4.02311100  | 0.36645900  |
| H | 1.41491200  | 4.32236900  | 1.20919000  |
| C | -1.03586800 | 2.59770900  | -1.32528000 |
| H | -1.72171300 | 3.33735600  | -0.91965500 |
| C | -1.13117200 | 2.30436100  | -2.63049600 |
| H | -1.89081300 | 2.84956000  | -3.19266400 |
| C | -3.27600500 | -0.88624700 | -1.97064900 |
| H | -3.00512700 | -1.63471100 | -2.70623200 |
| C | -4.25856900 | 0.02529800  | -2.14635800 |
| C | -5.11284800 | 0.10541500  | -3.38333700 |
| H | -6.17485700 | -0.02345100 | -3.14045100 |
| H | -4.83580600 | -0.66341400 | -4.10936800 |

|   |             |             |             |
|---|-------------|-------------|-------------|
| H | -5.01854300 | 1.08421100  | -3.87040200 |
| C | -4.46646200 | 0.97872900  | -1.01481500 |
| C | -5.56438300 | 2.00780400  | -1.06798300 |
| H | -5.57499600 | 2.62031100  | -0.16257900 |
| H | -6.54946400 | 1.53500600  | -1.16692200 |
| H | -5.44665200 | 2.67644900  | -1.93020400 |
| C | -3.62184600 | 0.83132400  | 0.02591600  |
| H | -3.64162100 | 1.42919200  | 0.92938100  |
| C | -3.06779800 | -1.98037500 | 0.90473100  |
| C | -4.11123400 | -2.83357700 | 0.52471700  |
| H | -4.54133000 | -2.75803400 | -0.46886800 |
| C | -4.60659200 | -3.77727400 | 1.42713600  |
| H | -5.41404800 | -4.43798800 | 1.12431300  |
| C | -4.07265000 | -3.86873900 | 2.71428700  |
| H | -4.46214600 | -4.60209800 | 3.41433200  |
| C | -3.03778400 | -3.01419400 | 3.10045800  |
| H | -2.62240200 | -3.07684100 | 4.10238900  |
| C | -2.53348100 | -2.07601300 | 2.19716100  |
| H | -1.72776100 | -1.41347200 | 2.50437100  |
| N | 0.65690500  | -2.58257000 | -0.49620000 |
| P | 0.14654800  | 1.92806900  | -0.09594500 |
| C | -0.32294500 | 1.34017200  | -3.44370800 |
| H | 0.35372100  | 1.88146500  | -4.11876700 |
| H | 0.27689400  | 0.67002500  | -2.82113200 |
| H | -0.97969300 | 0.72996400  | -4.07485700 |

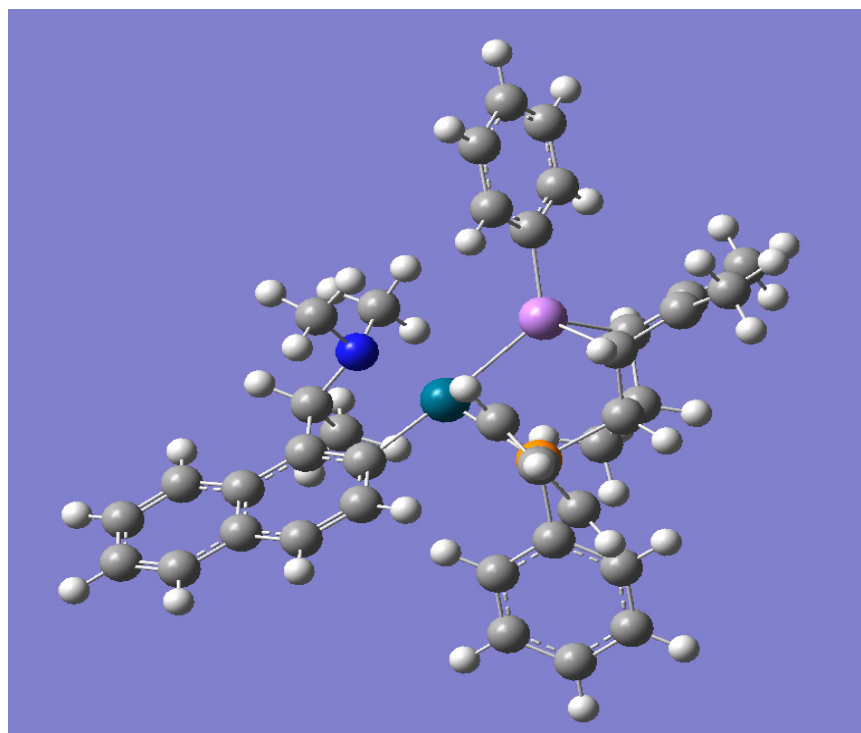

Optimized Structure of *exo*-(-)-2

Gas phase energy: -4344.94410006 hartrees

Solvation (CH<sub>2</sub>Cl<sub>2</sub>) energy: -4344.99706649 hartrees

Gibbs free energy: -4344.276002 hartrees

|    |             |             |             |
|----|-------------|-------------|-------------|
| Pd | 0.41051700  | -0.56765600 | -0.15520700 |
| As | -2.13514600 | -0.69973400 | -0.31594000 |
| C  | 2.41761800  | -0.47736200 | 0.26511200  |
| C  | 3.06875300  | 0.45867900  | 1.10979300  |
| H  | 2.51705100  | 1.28272800  | 1.54955100  |
| C  | 4.41008500  | 0.33111400  | 1.39751400  |
| H  | 4.89808000  | 1.05217200  | 2.04951200  |
| C  | 5.18054600  | -0.72788100 | 0.85350500  |
| C  | 4.53894200  | -1.69550600 | 0.00882300  |
| C  | 3.13709800  | -1.54996500 | -0.25329800 |
| C  | 6.56804400  | -0.85321600 | 1.13268800  |
| H  | 7.03727700  | -0.11329700 | 1.77634800  |
| C  | 7.30706700  | -1.88508600 | 0.60194900  |
| H  | 8.36725700  | -1.97051200 | 0.82119500  |
| C  | 6.68221700  | -2.83946500 | -0.23543700 |
| H  | 7.26952000  | -3.65060900 | -0.65651000 |
| C  | 5.33803000  | -2.74838800 | -0.52424100 |
| H  | 4.89288500  | -3.49030000 | -1.17935900 |
| C  | 2.37838900  | -2.54855200 | -1.10247800 |
| H  | 2.81857100  | -3.55253700 | -1.02462200 |

|   |             |             |             |
|---|-------------|-------------|-------------|
| C | 2.38613500  | -2.13269000 | -2.58087300 |
| H | 1.96598200  | -2.89742400 | -3.24096500 |
| H | 3.42255300  | -1.96352900 | -2.88736500 |
| H | 1.84039900  | -1.19304600 | -2.72182400 |
| C | 1.02842700  | -3.39131600 | 0.76552800  |
| H | 0.03494000  | -3.39462800 | 1.21901100  |
| H | 1.73436300  | -2.90782700 | 1.43973700  |
| H | 1.34380300  | -4.43032800 | 0.59327600  |
| C | 0.05800300  | -3.38152300 | -1.43318100 |
| H | 0.47551000  | -4.36458700 | -1.69509000 |
| H | -0.11249800 | -2.80820600 | -2.34369400 |
| H | -0.89627000 | -3.53176700 | -0.92497300 |
| C | -0.00951100 | 2.34670200  | 1.77763500  |
| C | 0.04741000  | 3.71368400  | 2.09584100  |
| H | 0.12126100  | 4.45897700  | 1.31115800  |
| C | 0.03328400  | 4.12752600  | 3.42827400  |
| H | 0.08199900  | 5.18736900  | 3.66083300  |
| C | -0.03477600 | 3.18652600  | 4.45785800  |
| H | -0.04149200 | 3.51316100  | 5.49366900  |
| C | -0.07906900 | 1.82480200  | 4.15288300  |
| H | -0.11455700 | 1.08714000  | 4.94940500  |
| C | -0.06054800 | 1.40690600  | 2.82191300  |
| H | -0.06501900 | 0.34578500  | 2.58695500  |
| C | 0.88620600  | 2.95884100  | -0.96299500 |
| C | 2.17188000  | 2.64358200  | -1.42833000 |
| H | 2.60661700  | 1.67628400  | -1.20431200 |
| C | 2.89735500  | 3.57052100  | -2.17920400 |
| H | 3.89220100  | 3.31274400  | -2.53058400 |
| C | 2.34820200  | 4.81702600  | -2.48090000 |
| H | 2.91328100  | 5.53512200  | -3.06794400 |
| C | 1.06520400  | 5.13745600  | -2.03075600 |
| H | 0.62801000  | 6.10314100  | -2.26757000 |
| C | 0.33677400  | 4.21602600  | -1.27860500 |
| H | -0.66357700 | 4.48343600  | -0.95194500 |
| C | -1.86880700 | 1.94986000  | -0.45511200 |
| H | -2.12999100 | 2.99913500  | -0.28410300 |
| C | -2.24388600 | 1.52213600  | -1.94059900 |
| H | -2.91484700 | 2.30271300  | -2.31872900 |
| C | -3.12106500 | 0.22826500  | -1.79643300 |
| H | -3.23050400 | -0.31090100 | -2.73874700 |
| C | -4.42593700 | 0.63891500  | -1.12886900 |
| C | -5.70909100 | 0.59789900  | -1.90501800 |
| H | -6.55843100 | 0.95818000  | -1.31908700 |
| H | -5.94055800 | -0.42336100 | -2.23620900 |



|   |             |             |             |
|---|-------------|-------------|-------------|
| H | -5.64522300 | 1.21389000  | -2.81266900 |
| C | -4.20338500 | 1.11870100  | 0.11123700  |
| C | -5.18250100 | 1.71482100  | 1.07884800  |
| H | -4.92586400 | 2.75660200  | 1.31549000  |
| H | -5.17672600 | 1.16632500  | 2.03033300  |
| H | -6.20525400 | 1.70416400  | 0.69345600  |
| C | -2.73286100 | 1.03985400  | 0.48448300  |
| H | -2.52531400 | 1.19205100  | 1.54313900  |
| C | -3.24225000 | -2.13685300 | 0.36082500  |
| C | -4.22167700 | -2.75657100 | -0.42611400 |
| H | -4.41562200 | -2.41020500 | -1.43667800 |
| C | -4.96009200 | -3.82518000 | 0.08668600  |
| H | -5.72024000 | -4.29839400 | -0.52821400 |
| C | -4.72495300 | -4.28149200 | 1.38517000  |
| H | -5.30245500 | -5.11089600 | 1.78267700  |
| C | -3.74393000 | -3.67267000 | 2.17197100  |
| H | -3.55830800 | -4.02449200 | 3.18274900  |
| C | -2.99839800 | -2.61063300 | 1.65887400  |
| H | -2.23562800 | -2.14285400 | 2.27765000  |
| N | 0.97662400  | -2.65135700 | -0.52597200 |
| P | -0.05314500 | 1.73894000  | 0.03944900  |
| C | -1.12362000 | 1.36190300  | -2.97787400 |
| H | -0.38708800 | 0.60332200  | -2.68842200 |
| H | -1.56341000 | 1.04998200  | -3.93201700 |
| H | -0.59170800 | 2.29969600  | -3.15147200 |

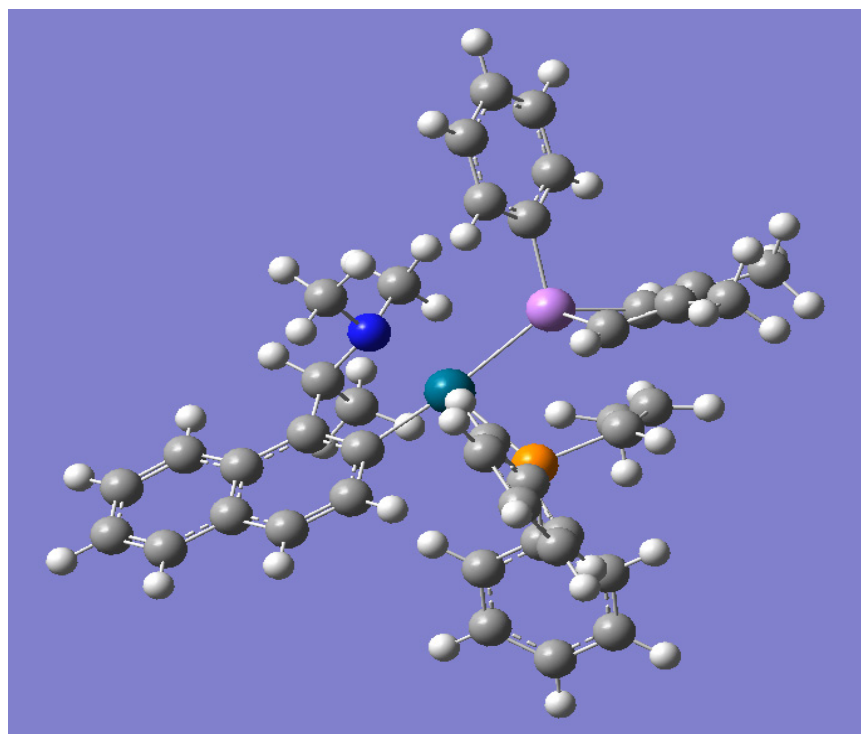

Transition state structure for TS-*cis*-Me

Imaginary frequencies:  $-477.1279 \text{ cm}^{-1}$

Gas phase energy:  $-4344.87745701 \text{ hartrees}$

Solvation ( $\text{CH}_2\text{Cl}_2$ ) energy:  $-4344.93030865 \text{ hartrees}$

Gibbs free energy:  $-4344.214312 \text{ hartrees}$

|    |             |             |             |
|----|-------------|-------------|-------------|
| Pd | 0.36739700  | -0.48440300 | -0.15902400 |
| As | -2.20148200 | -0.64616700 | -0.26235700 |
| C  | 2.36009400  | -0.45073100 | 0.31788300  |
| C  | 2.99642500  | 0.44709700  | 1.21361400  |
| H  | 2.44655800  | 1.27301400  | 1.65125200  |
| C  | 4.32266900  | 0.28176800  | 1.54852700  |
| H  | 4.79960700  | 0.97379300  | 2.23898000  |
| C  | 5.09205800  | -0.77693600 | 1.00264900  |
| C  | 4.46396100  | -1.70510100 | 0.10537700  |
| C  | 3.07634400  | -1.52245400 | -0.20511100 |
| C  | 6.46526000  | -0.93954900 | 1.32932000  |
| H  | 6.92439700  | -0.22920100 | 2.01237100  |
| C  | 7.20321800  | -1.97029300 | 0.79489700  |
| H  | 8.25249400  | -2.08439600 | 1.05058900  |
| C  | 6.59176200  | -2.88580000 | -0.09418900 |
| H  | 7.17847500  | -3.69589700 | -0.51811000 |
| C  | 5.26157300  | -2.75796300 | -0.42991300 |
| H  | 4.82690500  | -3.46982200 | -1.12416900 |
| C  | 2.32999200  | -2.47823100 | -1.11100100 |

|   |             |             |             |
|---|-------------|-------------|-------------|
| H | 2.75353800  | -3.49079900 | -1.05543700 |
| C | 2.39237600  | -2.01137400 | -2.57297300 |
| H | 1.98240900  | -2.74575500 | -3.27271300 |
| H | 3.44103500  | -1.84970000 | -2.83948900 |
| H | 1.86689900  | -1.05822800 | -2.69896000 |
| C | 0.91305100  | -3.36698500 | 0.68288200  |
| H | -0.09599300 | -3.37863300 | 1.09991800  |
| H | 1.59835200  | -2.91364700 | 1.39840300  |
| H | 1.22771500  | -4.40175200 | 0.48476400  |
| C | 0.01503500  | -3.26337000 | -1.54409600 |
| H | 0.43240400  | -4.23819600 | -1.83575700 |
| H | -0.12275200 | -2.65126500 | -2.43509700 |
| H | -0.95481600 | -3.42821500 | -1.07262800 |
| C | 0.03468100  | 2.51061600  | 1.69198000  |
| C | 0.14605800  | 3.88731700  | 1.94243400  |
| H | 0.26482100  | 4.58689000  | 1.12121500  |
| C | 0.12453500  | 4.36789400  | 3.25271900  |
| H | 0.21452000  | 5.43500100  | 3.43427600  |
| C | -0.00290000 | 3.48278100  | 4.32514300  |
| H | -0.01411800 | 3.86007100  | 5.34358500  |
| C | -0.10109100 | 2.11033000  | 4.08623900  |
| H | -0.18270900 | 1.41566100  | 4.91740400  |
| C | -0.07719700 | 1.62628800  | 2.77781100  |
| H | -0.12423900 | 0.55564800  | 2.59463000  |
| C | 1.03755500  | 2.94291000  | -1.05704200 |
| C | 2.34344500  | 2.58231200  | -1.41981800 |
| H | 2.75296600  | 1.63174600  | -1.10028000 |
| C | 3.12321200  | 3.44329700  | -2.19505900 |
| H | 4.13333100  | 3.15060600  | -2.46692400 |
| C | 2.60918800  | 4.66791900  | -2.62246700 |
| H | 3.21733400  | 5.33428300  | -3.22735600 |
| C | 1.30487600  | 5.03037900  | -2.27796800 |
| H | 0.89358800  | 5.97764300  | -2.61504400 |
| C | 0.52166700  | 4.17325000  | -1.50504400 |
| H | -0.49846800 | 4.45803700  | -1.26478000 |
| C | -1.71911200 | 2.17445800  | -0.56448100 |
| H | -2.22104800 | 2.97034100  | -0.02449400 |
| C | -2.21295000 | 1.81291100  | -1.84727500 |
| H | -3.02881300 | 2.44444200  | -2.19391400 |
| C | -3.40020300 | 0.14659500  | -1.59083100 |
| H | -3.49670500 | -0.25453400 | -2.59564500 |
| C | -4.53561700 | 0.64061600  | -0.91455700 |
| C | -5.81064800 | 0.99484200  | -1.63130800 |
| H | -6.68512200 | 0.60928000  | -1.09356100 |

|   |             |             |             |
|---|-------------|-------------|-------------|
| H | -5.83127300 | 0.58749500  | -2.64575500 |
| H | -5.94338300 | 2.08395300  | -1.70362300 |
| C | -4.29995100 | 0.98985900  | 0.44035100  |
| C | -5.29538200 | 1.77075100  | 1.26085500  |
| H | -5.53974100 | 2.73547700  | 0.79714100  |
| H | -4.91646300 | 1.96577400  | 2.26758900  |
| H | -6.23870400 | 1.21972300  | 1.36049700  |
| C | -3.01836400 | 0.68301700  | 0.88633500  |
| H | -2.67245000 | 0.90958500  | 1.88842200  |
| C | -3.12072300 | -2.29542900 | 0.26009500  |
| C | -3.93403700 | -3.01560300 | -0.62479700 |
| H | -4.11593200 | -2.64662400 | -1.62978200 |
| C | -4.53086200 | -4.21144500 | -0.21771300 |
| H | -5.16485800 | -4.75861800 | -0.90969100 |
| C | -4.31889100 | -4.69888600 | 1.07320500  |
| H | -4.78678100 | -5.62689500 | 1.38836900  |
| C | -3.50294000 | -3.99051900 | 1.95852900  |
| H | -3.33639300 | -4.36301400 | 2.96532300  |
| C | -2.90126400 | -2.79853200 | 1.55132700  |
| H | -2.27149300 | -2.25377000 | 2.25148700  |
| N | 0.91097900  | -2.58041100 | -0.58109200 |
| P | -0.01228800 | 1.83460400  | -0.01861800 |
| C | -1.31024500 | 1.36737900  | -2.98778300 |
| H | -0.59100900 | 0.60139500  | -2.67858600 |
| H | -1.89591300 | 0.96879200  | -3.82175700 |
| H | -0.73603500 | 2.22212200  | -3.36360400 |

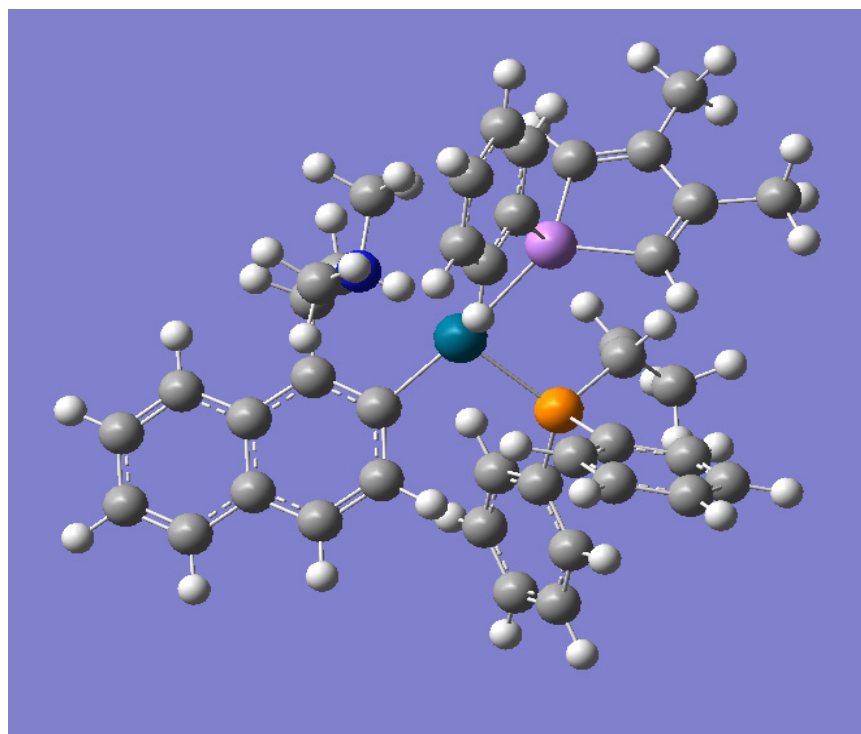

Transition state structure for TS-Me-1

Imaginary frequencies:  $-979.5280 \text{ cm}^{-1}$

Gas phase energy:  $-4344.83127659 \text{ hartrees}$

Solvation ( $\text{CH}_2\text{Cl}_2$ ) energy:  $-4344.84499900 \text{ hartrees}$

Gibbs free energy:  $-4344.181364 \text{ hartrees}$

|    |             |             |             |
|----|-------------|-------------|-------------|
| Pd | 0.23521400  | -0.48276200 | -0.10445900 |
| As | -2.39553200 | -0.67042800 | -0.17552400 |
| C  | 2.24647300  | -0.61431400 | 0.22791700  |
| C  | 2.99678200  | 0.19900100  | 1.11336600  |
| H  | 2.53853000  | 1.04444700  | 1.61418500  |
| C  | 4.32542300  | -0.07196200 | 1.35491700  |
| H  | 4.89132900  | 0.55233200  | 2.04254400  |
| C  | 4.98398600  | -1.14999700 | 0.71040500  |
| C  | 4.23460200  | -1.99720000 | -0.17330100 |
| C  | 2.84292500  | -1.71689600 | -0.37097000 |
| C  | 6.36310700  | -1.41299800 | 0.92877700  |
| H  | 6.91549500  | -0.76309800 | 1.60290000  |
| C  | 6.99188900  | -2.46381000 | 0.30160000  |
| H  | 8.04690800  | -2.65454900 | 0.47469100  |
| C  | 6.26001800  | -3.29977600 | -0.57464000 |
| H  | 6.76067300  | -4.12578300 | -1.07192000 |
| C  | 4.92031700  | -3.07482700 | -0.80532000 |
| H  | 4.39166600  | -3.72739400 | -1.49283800 |

|   |             |             |             |
|---|-------------|-------------|-------------|
| C | 1.95443500  | -2.62066300 | -1.19819700 |
| H | 2.33042000  | -3.65359800 | -1.19099600 |
| C | 1.87257800  | -2.15052900 | -2.65783900 |
| H | 1.35742700  | -2.86557400 | -3.30649200 |
| H | 2.89022400  | -2.02915100 | -3.04080800 |
| H | 1.37128100  | -1.17822800 | -2.72438300 |
| C | 0.71444700  | -3.41383500 | 0.76456400  |
| H | -0.23634800 | -3.36570200 | 1.29796300  |
| H | 1.49938400  | -2.98246000 | 1.38413400  |
| H | 0.95565300  | -4.46605700 | 0.55589000  |
| C | -0.41718200 | -3.32696400 | -1.34768600 |
| H | -0.06942800 | -4.32618300 | -1.64873400 |
| H | -0.63054200 | -2.73981500 | -2.24047000 |
| H | -1.33427100 | -3.44490600 | -0.76657400 |
| C | -0.61516700 | 2.54610900  | 1.39323800  |
| C | -1.33843400 | 3.74999800  | 1.34974800  |
| H | -1.43222100 | 4.29461200  | 0.41449600  |
| C | -1.93785300 | 4.25162300  | 2.50611200  |
| H | -2.49660100 | 5.18214000  | 2.46297100  |
| C | -1.81517000 | 3.56259500  | 3.71536400  |
| H | -2.28046900 | 3.95641300  | 4.61430000  |
| C | -1.09325500 | 2.36807500  | 3.76796000  |
| H | -0.99444500 | 1.83159300  | 4.70722100  |
| C | -0.49988600 | 1.85829600  | 2.61216700  |
| H | 0.05339100  | 0.92372400  | 2.65472700  |
| C | 1.74567100  | 2.80211400  | -0.36559400 |
| C | 2.59365500  | 2.42270300  | -1.41852500 |
| H | 2.36261100  | 1.54664900  | -2.01622800 |
| C | 3.74802700  | 3.15563400  | -1.68775600 |
| H | 4.39835300  | 2.85491100  | -2.50404700 |
| C | 4.07564700  | 4.26268300  | -0.90015900 |
| H | 4.98031800  | 4.82749100  | -1.10590100 |
| C | 3.24283400  | 4.63679400  | 0.15474800  |
| H | 3.49522700  | 5.49345400  | 0.77301200  |
| C | 2.07790700  | 3.91323400  | 0.42221000  |
| H | 1.43588900  | 4.21873600  | 1.24170600  |
| C | -0.85807800 | 2.36982800  | -1.49325100 |
| H | -1.93202800 | 2.29909400  | -1.29335100 |
| C | -0.37183600 | 2.65616700  | -2.83253500 |
| H | -0.28009300 | 1.83395000  | -3.54495600 |
| C | -3.32110300 | -1.07138000 | -1.81830200 |
| H | -3.05434600 | -1.87045800 | -2.49997000 |
| C | -4.30039000 | -0.17146700 | -2.05785800 |
| C | -5.15426000 | -0.17272100 | -3.29752200 |

|   |             |             |             |
|---|-------------|-------------|-------------|
| H | -6.21826000 | -0.26421200 | -3.04690200 |
| H | -4.88949800 | -0.99981300 | -3.96131900 |
| H | -5.04170200 | 0.76326400  | -3.85912900 |
| C | -4.50127200 | 0.86046200  | -0.99529800 |
| C | -5.59572200 | 1.88744000  | -1.11778400 |
| H | -5.59996600 | 2.56423800  | -0.25940400 |
| H | -6.58197700 | 1.41042700  | -1.17694700 |
| H | -5.48081800 | 2.48996900  | -2.02758600 |
| C | -3.65548300 | 0.78130000  | 0.05421600  |
| H | -3.67365500 | 1.44064500  | 0.91400100  |
| C | -3.05345400 | -1.98195100 | 1.11801800  |
| C | -4.16305200 | -2.79219400 | 0.84672900  |
| H | -4.67046900 | -2.71749000 | -0.10989000 |
| C | -4.62083800 | -3.69395400 | 1.80909600  |
| H | -5.47966500 | -4.32260300 | 1.59136000  |
| C | -3.98204400 | -3.78550500 | 3.04798000  |
| H | -4.34204900 | -4.48696700 | 3.79495200  |
| C | -2.88036100 | -2.97369200 | 3.32533700  |
| H | -2.38272900 | -3.03809300 | 4.28892300  |
| C | -2.41381100 | -2.07691100 | 2.36123100  |
| H | -1.55397200 | -1.44819000 | 2.57991300  |
| N | 0.60138100  | -2.65261400 | -0.51043600 |
| P | 0.18883300  | 1.86405900  | -0.10662400 |
| C | -0.17648600 | 4.05780100  | -3.33348300 |
| H | 0.33980000  | 4.68244900  | -2.59435100 |
| H | 0.40357000  | 4.06809900  | -4.26142600 |
| H | -1.14138900 | 4.54884700  | -3.54520100 |

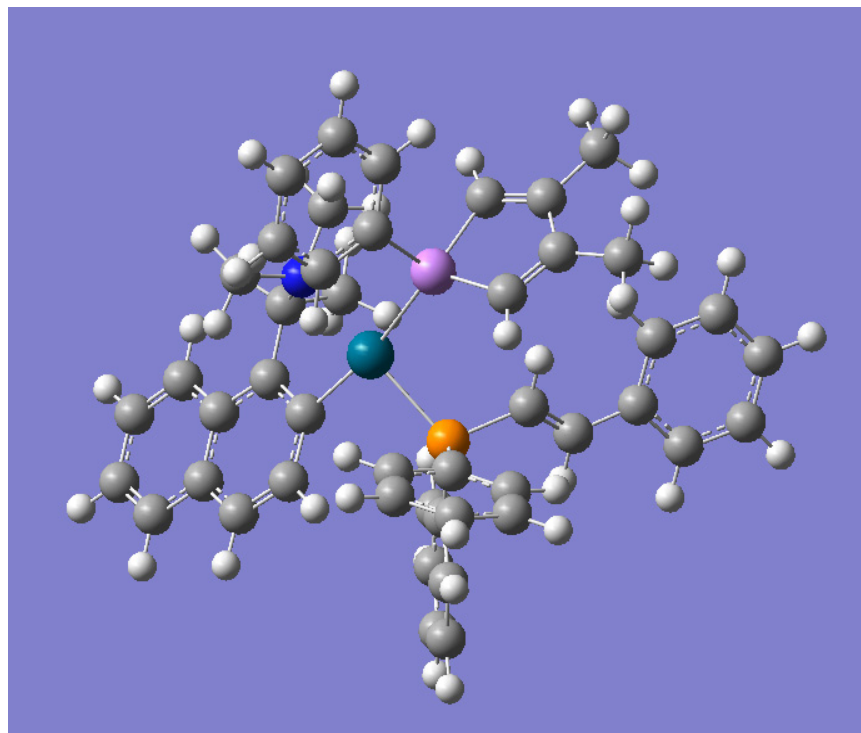

Optimized structure of *trans*-Ph-2

Gas phase energy: -4536.66379466 hartrees

Solvation (CH<sub>2</sub>Cl<sub>2</sub>) energy: -4536.71579234 hartrees

Gibbs free energy: -4535.957484 hartrees

|    |             |             |             |
|----|-------------|-------------|-------------|
| Pd | 0.72450400  | -0.59759400 | -0.18043000 |
| As | -1.62055600 | -1.79008200 | -0.22605200 |
| C  | 2.68123300  | -0.03988000 | 0.00094000  |
| C  | 3.27757500  | 0.54018900  | 1.14811500  |
| H  | 2.67316300  | 0.83225300  | 1.99954800  |
| C  | 4.63899300  | 0.74232300  | 1.20140100  |
| H  | 5.08951700  | 1.17944200  | 2.08956500  |
| C  | 5.47535300  | 0.40231900  | 0.10768500  |
| C  | 4.89179300  | -0.20584300 | -1.05425900 |
| C  | 3.47866600  | -0.44485000 | -1.06222800 |
| C  | 6.87568800  | 0.64036000  | 0.14323700  |
| H  | 7.30226300  | 1.09913800  | 1.03181100  |
| C  | 7.67910300  | 0.30210100  | -0.92121200 |
| H  | 8.74805500  | 0.49017400  | -0.88364300 |
| C  | 7.10921600  | -0.29300300 | -2.07163800 |
| H  | 7.74580400  | -0.55443900 | -2.91226300 |
| C  | 5.75542500  | -0.54110200 | -2.13712500 |
| H  | 5.34862200  | -0.98702600 | -3.03919300 |
| C  | 2.79625600  | -1.18398500 | -2.19284000 |



|   |             |             |             |
|---|-------------|-------------|-------------|
| H | 3.49275300  | -1.87589600 | -2.68689000 |
| C | 2.24659400  | -0.21670400 | -3.25097100 |
| H | 1.87377800  | -0.72914900 | -4.14309300 |
| H | 3.05598500  | 0.44882100  | -3.56574200 |
| H | 1.44652500  | 0.40362100  | -2.83153200 |
| C | 2.35394000  | -3.15535300 | -0.79951700 |
| H | 1.58109300  | -3.72544100 | -0.28136600 |
| H | 3.05425200  | -2.75121700 | -0.06992200 |
| H | 2.89312400  | -3.82333900 | -1.48667700 |
| C | 0.83529200  | -2.65084200 | -2.58487800 |
| H | 1.43134600  | -3.18221100 | -3.34124000 |
| H | 0.23403500  | -1.88591700 | -3.07567700 |
| H | 0.17391800  | -3.37346700 | -2.10180300 |
| C | -0.76793700 | 0.91030400  | 2.58307000  |
| C | -1.88617400 | 1.57604800  | 3.11027100  |
| H | -2.39421800 | 2.33312700  | 2.52015700  |
| C | -2.34936100 | 1.26415200  | 4.39002700  |
| H | -3.21578400 | 1.78295100  | 4.79028800  |
| C | -1.70026400 | 0.29101400  | 5.15388200  |
| H | -2.06243600 | 0.05092100  | 6.14935400  |
| C | -0.58624900 | -0.37430200 | 4.63626200  |
| H | -0.07963300 | -1.13134500 | 5.22799800  |
| C | -0.12471800 | -0.07107000 | 3.35469600  |
| H | 0.73566100  | -0.59787400 | 2.94990600  |
| C | 0.95203400  | 2.78094400  | 1.11060900  |
| C | 1.65977700  | 3.25746800  | -0.00617100 |
| H | 1.59871400  | 2.73028100  | -0.95375600 |
| C | 2.45246500  | 4.39837000  | 0.09811300  |
| H | 2.99479900  | 4.75876600  | -0.77116700 |
| C | 2.56043500  | 5.06731900  | 1.32101600  |
| H | 3.18590000  | 5.95155400  | 1.40325000  |
| C | 1.86714900  | 4.59528700  | 2.43557600  |
| H | 1.94910100  | 5.11029700  | 3.38840400  |
| C | 1.06199500  | 3.45790100  | 2.33355900  |
| H | 0.52436800  | 3.10385200  | 3.20677100  |
| C | -1.54562700 | 1.90685800  | -0.03984500 |
| H | -2.28009700 | 1.13864500  | -0.26638000 |
| C | -1.72785900 | 3.17289300  | -0.46743300 |
| H | -0.99331000 | 3.92737400  | -0.19261200 |
| C | -2.84704800 | 3.67153100  | -1.27468400 |
| C | -3.74640200 | 2.82369900  | -1.94975700 |
| H | -3.60352600 | 1.74731200  | -1.91467000 |
| C | -4.79813000 | 3.35315600  | -2.69079800 |
| H | -5.47861400 | 2.68812300  | -3.21578500 |

|   |             |             |             |
|---|-------------|-------------|-------------|
| C | -4.97555100 | 4.73856900  | -2.77536300 |
| H | -5.79679700 | 5.14763600  | -3.35663400 |
| C | -4.08570000 | 5.59204600  | -2.12131100 |
| H | -4.21197100 | 6.66861000  | -2.18890900 |
| C | -3.02808200 | 5.06233300  | -1.38410700 |
| H | -2.33511100 | 5.72998400  | -0.87782200 |
| C | -2.69826600 | -1.88326200 | -1.82355900 |
| H | -2.33437200 | -2.18098400 | -2.79969600 |
| C | -3.95998300 | -1.46107300 | -1.58525400 |
| C | -5.02576700 | -1.36722200 | -2.64453000 |
| H | -4.64247900 | -1.67089500 | -3.62210400 |
| H | -5.41289000 | -0.34424100 | -2.73311500 |
| H | -5.88301900 | -2.00716700 | -2.40113200 |
| C | -4.25739700 | -1.08540800 | -0.16883000 |
| C | -5.63399100 | -0.62672800 | 0.23383300  |
| H | -6.39067100 | -1.38723600 | 0.00482000  |
| H | -5.92447900 | 0.28447800  | -0.30433900 |
| H | -5.68050200 | -0.41547400 | 1.30520300  |
| C | -3.22052000 | -1.19799300 | 0.68789600  |
| H | -3.26759800 | -0.97434000 | 1.74686700  |
| C | -1.46517400 | -3.64066600 | 0.38860400  |
| C | -0.55652300 | -3.93398400 | 1.41409100  |
| H | 0.06375000  | -3.14562500 | 1.83311600  |
| C | -0.44814300 | -5.23696000 | 1.90592300  |
| H | 0.25491400  | -5.45572600 | 2.70473900  |
| C | -1.24076300 | -6.25357800 | 1.36948300  |
| H | -1.15338000 | -7.26794000 | 1.74772900  |
| C | -2.14627300 | -5.96429200 | 0.34588300  |
| H | -2.76566300 | -6.75275500 | -0.07230500 |
| C | -2.26325600 | -4.66177400 | -0.14239800 |
| H | -2.97639800 | -4.44162500 | -0.93063200 |
| N | 1.71683300  | -2.04449200 | -1.56029400 |
| P | -0.12120600 | 1.30557400  | 0.90995700  |

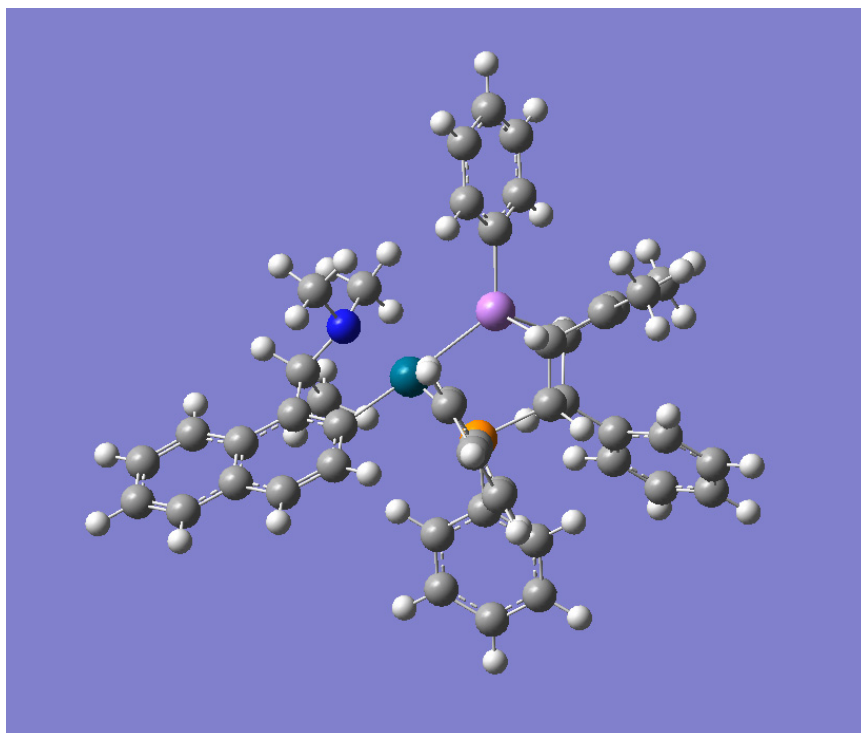

Optimized structure of *endo*-(-)-7

Gas phase energy: -4536.68178426 hartrees

Solvation (CH<sub>2</sub>Cl<sub>2</sub>) energy: -4536.73538077 hartrees

Gibbs free energy: -4535.965145 hartrees

|    |             |             |             |
|----|-------------|-------------|-------------|
| Pd | -0.93905700 | 0.64273600  | -0.12997100 |
| As | 1.44414200  | 1.54119400  | -0.12402800 |
| C  | -2.87532300 | -0.01377600 | 0.08809800  |
| C  | -3.37130500 | -0.92265200 | 1.05824500  |
| H  | -2.69751700 | -1.40705500 | 1.75636600  |
| C  | -4.71835600 | -1.19933700 | 1.14018500  |
| H  | -5.08630700 | -1.89504800 | 1.89105000  |
| C  | -5.64760500 | -0.59585000 | 0.25528500  |
| C  | -5.17066800 | 0.33620600  | -0.72674200 |
| C  | -3.76618700 | 0.62046800  | -0.77337400 |
| C  | -7.03583700 | -0.89035200 | 0.32517100  |
| H  | -7.37970400 | -1.59634500 | 1.07702600  |
| C  | -7.92969100 | -0.29972200 | -0.53788600 |
| H  | -8.98853200 | -0.53305000 | -0.47628300 |
| C  | -7.46596300 | 0.61576600  | -1.51210400 |
| H  | -8.17355500 | 1.07741500  | -2.19505700 |
| C  | -6.12646900 | 0.92506400  | -1.60507500 |
| H  | -5.80432700 | 1.62286500  | -2.37140300 |
| C  | -3.19284400 | 1.61224300  | -1.76399500 |
| H  | -3.91702700 | 2.40589900  | -1.99549200 |

|   |             |             |             |
|---|-------------|-------------|-------------|
| C | -2.80328800 | 0.91663300  | -3.07718900 |
| H | -2.52514000 | 1.62227600  | -3.86577900 |
| H | -3.66347200 | 0.34266600  | -3.43389500 |
| H | -1.97811300 | 0.21414500  | -2.91351200 |
| C | -2.51478200 | 3.22297800  | -0.03968100 |
| H | -1.66371300 | 3.64151900  | 0.50205100  |
| H | -3.15875100 | 2.68510600  | 0.65488600  |
| H | -3.08249700 | 4.04421900  | -0.50020500 |
| C | -1.21554400 | 3.08676800  | -2.05485200 |
| H | -1.86137000 | 3.78832900  | -2.60257600 |
| H | -0.71239600 | 2.43172500  | -2.76530000 |
| H | -0.46507700 | 3.66040600  | -1.50818300 |
| C | -0.15483300 | -1.56878500 | 2.53359900  |
| C | 0.02740100  | -2.82859000 | 3.12672300  |
| H | 0.27709900  | -3.69147400 | 2.51772300  |
| C | -0.13203600 | -2.98529700 | 4.50423200  |
| H | 0.00663500  | -3.96502800 | 4.95213000  |
| C | -0.47568400 | -1.89205800 | 5.30239600  |
| H | -0.60210000 | -2.01949100 | 6.37357800  |
| C | -0.67180800 | -0.63836800 | 4.71933500  |
| H | -0.95710400 | 0.21104300  | 5.33330800  |
| C | -0.51903500 | -0.47809400 | 3.34204200  |
| H | -0.70615000 | 0.49015700  | 2.88449300  |
| C | -0.16729700 | -2.86435700 | -0.13931500 |
| C | -1.34649100 | -3.05109700 | -0.87907500 |
| H | -2.08015800 | -2.25515300 | -0.93709300 |
| C | -1.58168200 | -4.25928100 | -1.53726600 |
| H | -2.49954700 | -4.39102400 | -2.10284400 |
| C | -0.64296100 | -5.28976300 | -1.47302000 |
| H | -0.82697700 | -6.22796500 | -1.98852300 |
| C | 0.53852900  | -5.10951800 | -0.75073700 |
| H | 1.27946300  | -5.90224200 | -0.70658000 |
| C | 0.77840200  | -3.90582100 | -0.08839000 |
| H | 1.71183200  | -3.78439500 | 0.45097500  |
| C | 1.97345300  | -0.97911900 | 0.59764900  |
| H | 2.48871900  | -1.78883800 | 1.12156700  |
| C | 2.40037500  | -0.89731500 | -0.91716800 |
| H | 1.51455500  | -1.03043300 | -1.54936100 |
| C | 3.41536100  | -1.93084900 | -1.38435800 |
| C | 3.31279100  | -2.42248700 | -2.69478800 |
| H | 2.49608900  | -2.08471200 | -3.32951500 |
| C | 4.23416500  | -3.34204800 | -3.19554900 |
| H | 4.13089000  | -3.70974300 | -4.21257800 |
| C | 5.27980400  | -3.79384800 | -2.38810900 |

|   |             |             |             |
|---|-------------|-------------|-------------|
| H | 5.99730900  | -4.51307700 | -2.77232900 |
| C | 5.39328000  | -3.31740900 | -1.08122800 |
| H | 6.20209800  | -3.66378900 | -0.44371500 |
| C | 4.47071300  | -2.39410800 | -0.58356900 |
| H | 4.58712000  | -2.03120400 | 0.43300500  |
| C | 2.90127600  | 0.58320500  | -1.13013200 |
| H | 3.02706000  | 0.82568500  | -2.18618200 |
| C | 4.12128100  | 0.83223200  | -0.25621500 |
| C | 5.45803900  | 1.09091700  | -0.88553000 |
| H | 6.23583200  | 1.27781500  | -0.14042800 |
| H | 5.41759600  | 1.96334600  | -1.55150200 |
| H | 5.77623500  | 0.23754900  | -1.49777500 |
| C | 3.81568400  | 0.70191000  | 1.05162800  |
| C | 4.72393100  | 0.79033000  | 2.24215400  |
| H | 4.74913600  | -0.15766500 | 2.79773800  |
| H | 4.37317200  | 1.55608900  | 2.94700200  |
| H | 5.75092200  | 1.03841600  | 1.96253000  |
| C | 2.34067000  | 0.39450200  | 1.25256300  |
| H | 1.99062900  | 0.48904400  | 2.28117000  |
| C | 1.98028400  | 3.38329000  | 0.14559400  |
| C | 2.83610400  | 4.04233500  | -0.74643900 |
| H | 3.26024100  | 3.51297400  | -1.59449800 |
| C | 3.15483400  | 5.38725100  | -0.54725400 |
| H | 3.82282000  | 5.89064400  | -1.24024700 |
| C | 2.61994100  | 6.08137200  | 0.53977900  |
| H | 2.87138500  | 7.12657700  | 0.69400900  |
| C | 1.75856700  | 5.43181400  | 1.42757900  |
| H | 1.34081200  | 5.96853500  | 2.27452600  |
| C | 1.43219600  | 4.08993700  | 1.22660400  |
| H | 0.76034200  | 3.59205900  | 1.92248100  |
| N | -2.01529200 | 2.29258500  | -1.09021700 |
| P | 0.11734400  | -1.27960300 | 0.73982700  |

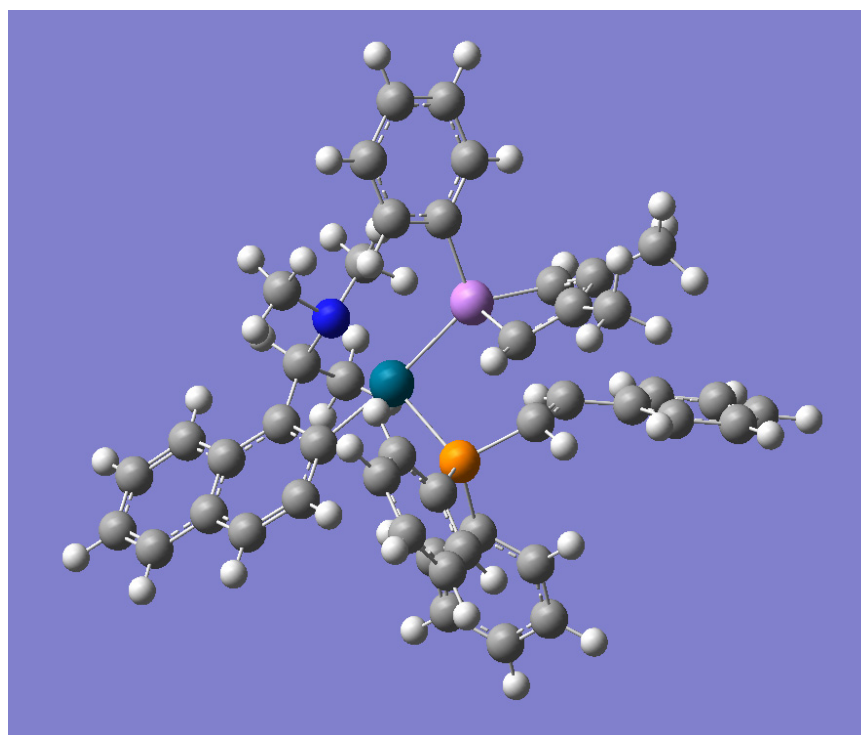

Transition state structure for TS-*trans*-Ph

Imaginary frequencies:  $-443.3753 \text{ cm}^{-1}$

Gas phase energy:  $-4536.61766136 \text{ hartrees}$

Solvation ( $\text{CH}_2\text{Cl}_2$ ) energy:  $-4536.67091834 \text{ hartrees}$

Gibbs free energy:  $-4535.906873 \text{ hartrees}$

|    |             |             |             |
|----|-------------|-------------|-------------|
| Pd | 0.01749000  | -0.07607000 | 0.07490900  |
| As | 2.56439400  | -0.00426000 | 0.11517200  |
| C  | -2.00672300 | 0.23001800  | -0.04505400 |
| C  | -2.77793200 | 1.10331500  | 0.76454600  |
| H  | -2.32503400 | 1.62132400  | 1.60312200  |
| C  | -4.11335000 | 1.31234100  | 0.49664100  |
| H  | -4.69498300 | 1.98639100  | 1.12152800  |
| C  | -4.75757500 | 0.65526000  | -0.58259000 |
| C  | -3.99168800 | -0.22039600 | -1.42407600 |
| C  | -2.59882200 | -0.39723400 | -1.13628300 |
| C  | -6.13946600 | 0.85055700  | -0.84951300 |
| H  | -6.70387700 | 1.51852700  | -0.20359200 |
| C  | -6.75563400 | 0.20957500  | -1.89936900 |
| H  | -7.81278600 | 0.36511700  | -2.09334600 |
| C  | -6.00771400 | -0.65809900 | -2.73012200 |
| H  | -6.49823200 | -1.16593300 | -3.55579100 |
| C  | -4.66534100 | -0.86741900 | -2.50058800 |
| H  | -4.12444000 | -1.54777100 | -3.15050400 |

|   |             |             |             |
|---|-------------|-------------|-------------|
| C | -1.70716400 | -1.26284800 | -2.00158100 |
| H | -2.06410100 | -1.28768100 | -3.04072300 |
| C | -1.65810800 | -2.70508200 | -1.47582300 |
| H | -1.13156900 | -3.38614400 | -2.15117000 |
| H | -2.68440600 | -3.06952300 | -1.37171800 |
| H | -1.19027100 | -2.74274700 | -0.48561600 |
| C | -0.41637400 | 0.63260600  | -2.87070500 |
| H | 0.54112500  | 1.15508400  | -2.82930200 |
| H | -1.20412400 | 1.28553400  | -2.49669600 |
| H | -0.63201600 | 0.36649600  | -3.91539100 |
| C | 0.69031400  | -1.48585200 | -2.62167800 |
| H | 0.37374100  | -1.84317000 | -3.61241800 |
| H | 0.86966100  | -2.34228900 | -1.97217900 |
| H | 1.61934000  | -0.92396900 | -2.73603100 |
| C | 0.00245200  | 1.84893300  | 3.04805000  |
| C | -0.26739800 | 2.10446400  | 4.40204300  |
| H | -0.40793100 | 1.28323800  | 5.09767000  |
| C | -0.37716300 | 3.41804600  | 4.86035300  |
| H | -0.58975300 | 3.60455800  | 5.90905200  |
| C | -0.22433400 | 4.48758000  | 3.97540800  |
| H | -0.31561200 | 5.50826700  | 4.33535200  |
| C | 0.03148800  | 4.24280400  | 2.62454300  |
| H | 0.13455000  | 5.07098500  | 1.92926600  |
| C | 0.13900300  | 2.93078900  | 2.16190000  |
| H | 0.30850600  | 2.73903800  | 1.10522100  |
| C | -0.80597300 | -0.96472200 | 3.46326100  |
| C | -2.06046600 | -1.41263000 | 3.02259400  |
| H | -2.42684300 | -1.12493800 | 2.04491600  |
| C | -2.84366900 | -2.23259100 | 3.83753200  |
| H | -3.81239300 | -2.57091900 | 3.48115100  |
| C | -2.38479500 | -2.61958100 | 5.09665000  |
| H | -2.99478600 | -3.25970000 | 5.72748900  |
| C | -1.13212900 | -2.18906100 | 5.53966000  |
| H | -0.76140400 | -2.49514600 | 6.51365000  |
| C | -0.34459600 | -1.37191100 | 4.72934400  |
| H | 0.63534800  | -1.07069100 | 5.08460000  |
| C | 1.95288100  | -0.31207800 | 2.86630700  |
| H | 2.27676600  | 0.12287700  | 3.80803600  |
| C | 2.32570700  | -1.65202800 | 2.59236100  |
| H | 1.66931100  | -2.23018400 | 1.94561700  |
| C | 3.16752500  | -2.46388000 | 3.48250900  |
| C | 3.21254100  | -3.86015900 | 3.29567000  |
| H | 2.63014000  | -4.30644300 | 2.49241700  |
| C | 3.98102600  | -4.67358100 | 4.12270000  |

|   |             |             |             |
|---|-------------|-------------|-------------|
| H | 3.99367500  | -5.74781600 | 3.96145900  |
| C | 4.73051900  | -4.11166200 | 5.16087300  |
| H | 5.32871800  | -4.74507100 | 5.80914800  |
| C | 4.69620600  | -2.73050200 | 5.36342300  |
| H | 5.26744700  | -2.28559800 | 6.17360400  |
| C | 3.92258900  | -1.91503700 | 4.53696400  |
| H | 3.90521200  | -0.84517500 | 4.72303100  |
| C | 3.81356300  | -1.33186400 | 0.76421800  |
| H | 3.92755600  | -2.32001600 | 0.33142000  |
| C | 4.84757700  | -0.69406300 | 1.45662100  |
| C | 6.16072000  | -1.36655300 | 1.76330500  |
| H | 6.99968900  | -0.75939500 | 1.40063400  |
| H | 6.22700700  | -2.34980400 | 1.29042400  |
| H | 6.30003600  | -1.50245100 | 2.84207200  |
| C | 4.50749000  | 0.58637900  | 1.96622400  |
| C | 5.43267300  | 1.39276900  | 2.84077100  |
| H | 5.77405600  | 0.82797000  | 3.71749900  |
| H | 4.95021900  | 2.30850200  | 3.19404200  |
| H | 6.33411700  | 1.68713000  | 2.28744100  |
| C | 3.18015600  | 0.96750400  | 1.69456800  |
| H | 2.82157500  | 1.96231000  | 1.94173300  |
| C | 3.49208300  | 0.86916500  | -1.37063100 |
| C | 4.57944400  | 0.28158100  | -2.02941300 |
| H | 4.96514300  | -0.67783500 | -1.69954300 |
| C | 5.18271300  | 0.93269200  | -3.10820500 |
| H | 6.02674000  | 0.46988400  | -3.61183200 |
| C | 4.70684900  | 2.17344900  | -3.53584200 |
| H | 5.17968500  | 2.67879600  | -4.37286500 |
| C | 3.62015500  | 2.76375900  | -2.88585400 |
| H | 3.24806500  | 3.73097200  | -3.21178800 |
| C | 3.01033900  | 2.11035700  | -1.81366600 |
| H | 2.16458800  | 2.57926800  | -1.31486000 |
| N | -0.34150600 | -0.59728000 | -2.03478000 |
| P | 0.22350500  | 0.14035500  | 2.40648800  |



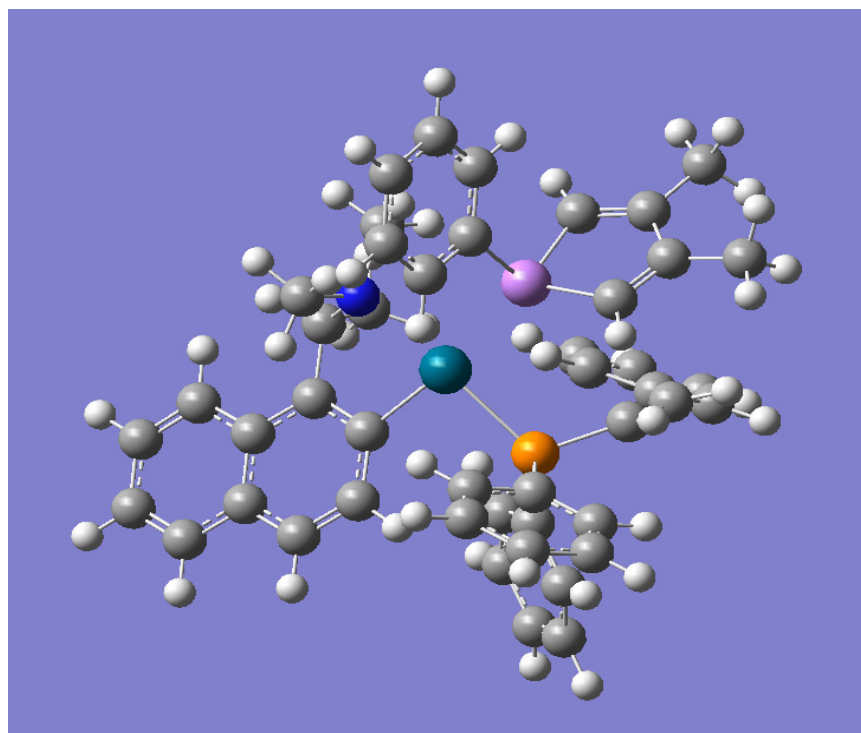

Optimized structure of *cis*-Ph-2

Gas phase energy: -4536.64980154 hartrees

Solvation (CH<sub>2</sub>Cl<sub>2</sub>) energy: -4536.70365579 hartrees

Gibbs free energy: -4535.941465 hartrees

|    |             |             |             |
|----|-------------|-------------|-------------|
| Pd | 0.16798100  | -0.62695700 | -0.09035000 |
| As | -2.46164700 | -0.60564600 | -0.32526500 |
| C  | 2.15636700  | -1.02808800 | 0.21495400  |
| C  | 2.90776900  | -0.70506400 | 1.37438900  |
| H  | 2.47864800  | -0.10379800 | 2.16755000  |
| C  | 4.20315500  | -1.14896300 | 1.51940500  |
| H  | 4.76484200  | -0.89932700 | 2.41662800  |
| C  | 4.83354600  | -1.91981000 | 0.51033700  |
| C  | 4.08833900  | -2.26879600 | -0.66495600 |
| C  | 2.72902400  | -1.82395600 | -0.77081500 |
| C  | 6.17897100  | -2.35660800 | 0.64238600  |
| H  | 6.72762000  | -2.08460000 | 1.54067700  |
| C  | 6.78038100  | -3.10503700 | -0.34302200 |
| H  | 7.80996700  | -3.43240700 | -0.23269400 |
| C  | 6.05336800  | -3.44839200 | -1.50729100 |
| H  | 6.53217300  | -4.03581500 | -2.28569200 |
| C  | 4.74578700  | -3.04311500 | -1.66475700 |
| H  | 4.22176000  | -3.31463400 | -2.57549800 |
| C  | 1.85985500  | -2.21495000 | -1.94524700 |
| H  | 2.16342900  | -3.19006500 | -2.35108500 |

|   |             |             |             |
|---|-------------|-------------|-------------|
| C | 1.94995700  | -1.18043300 | -3.07586700 |
| H | 1.44677900  | -1.50463200 | -3.99169400 |
| H | 3.00565400  | -1.02176300 | -3.31529900 |
| H | 1.53244500  | -0.22030400 | -2.75530400 |
| C | 0.40097000  | -3.64926300 | -0.60576800 |
| H | -0.58585900 | -3.74920100 | -0.15207400 |
| H | 1.15862300  | -3.61270500 | 0.17609500  |
| H | 0.58881300  | -4.52035300 | -1.24990200 |
| C | -0.52896300 | -2.53196100 | -2.51684400 |
| H | -0.21560000 | -3.32075700 | -3.21618000 |
| H | -0.62656100 | -1.59163000 | -3.05910300 |
| H | -1.49904100 | -2.81044600 | -2.10122400 |
| C | -0.30965300 | 1.05827200  | 2.87339200  |
| C | -0.87445300 | 2.04882200  | 3.69684900  |
| H | -1.04473700 | 3.05089900  | 3.31457100  |
| C | -1.22570100 | 1.75825900  | 5.01600700  |
| H | -1.66012900 | 2.53467300  | 5.63919000  |
| C | -1.01932600 | 0.47760700  | 5.53294000  |
| H | -1.29326400 | 0.25460000  | 6.56000000  |
| C | -0.46353800 | -0.51476700 | 4.72399300  |
| H | -0.30207300 | -1.51389400 | 5.11856400  |
| C | -0.11499300 | -0.22843400 | 3.40281500  |
| H | 0.31119400  | -1.00830200 | 2.77812800  |
| C | 1.73746800  | 2.38103800  | 1.19085400  |
| C | 2.65822300  | 2.31547100  | 0.13511300  |
| H | 2.49299100  | 1.63282800  | -0.68924400 |
| C | 3.80394800  | 3.11107400  | 0.14823500  |
| H | 4.50788500  | 3.04986500  | -0.67661600 |
| C | 4.05062400  | 3.96986300  | 1.21984200  |
| H | 4.94713200  | 4.58309000  | 1.23215200  |
| C | 3.14582800  | 4.03138700  | 2.28132600  |
| H | 3.33551000  | 4.68932600  | 3.12455200  |
| C | 1.99469500  | 3.24378200  | 2.26868200  |
| H | 1.31126800  | 3.29696400  | 3.10876400  |
| C | -1.11184000 | 2.57703700  | 0.61311500  |
| H | -1.94857400 | 2.57920800  | 1.30611200  |
| C | -1.19527700 | 3.44686100  | -0.41469300 |
| H | -2.05928300 | 4.11305700  | -0.37518000 |
| C | -0.33846000 | 3.67550600  | -1.58487100 |
| C | 0.33613000  | 2.63817200  | -2.25094700 |
| H | 0.23183400  | 1.61730100  | -1.89179100 |
| C | 1.09717700  | 2.90082400  | -3.38888700 |
| H | 1.60276300  | 2.08677000  | -3.90144400 |
| C | 1.20361200  | 4.20472500  | -3.87868400 |

|   |             |             |             |
|---|-------------|-------------|-------------|
| H | 1.79831000  | 4.40746700  | -4.76469200 |
| C | 0.52699400  | 5.24419800  | -3.23503400 |
| H | 0.59608400  | 6.25870900  | -3.61656100 |
| C | -0.24967300 | 4.97838100  | -2.11020500 |
| H | -0.78571000 | 5.78762300  | -1.62036500 |
| C | -3.29061300 | -0.03531000 | -1.96742200 |
| H | -2.97172800 | -0.33419400 | -2.95906200 |
| C | -4.26457600 | 0.87086000  | -1.72952600 |
| C | -5.04805800 | 1.56039300  | -2.81389300 |
| H | -6.12217600 | 1.36007700  | -2.71612600 |
| H | -4.72968800 | 1.22979900  | -3.80590800 |
| H | -4.92346200 | 2.64932200  | -2.76265600 |
| C | -4.53783400 | 1.16277300  | -0.29000200 |
| C | -5.64622500 | 2.10142100  | 0.10752100  |
| H | -5.71696100 | 2.19190300  | 1.19469200  |
| H | -6.61683300 | 1.75215700  | -0.26598300 |
| H | -5.49007700 | 3.10477400  | -0.30885100 |
| C | -3.74228100 | 0.52098300  | 0.58964900  |
| H | -3.82265400 | 0.59860600  | 1.66773300  |
| C | -3.23386800 | -2.36605400 | 0.05354700  |
| C | -4.22837100 | -2.92919100 | -0.75581100 |
| H | -4.58128100 | -2.39845200 | -1.63446100 |
| C | -4.77535600 | -4.17186800 | -0.42835000 |
| H | -5.54402500 | -4.60435200 | -1.06269800 |
| C | -4.34325500 | -4.85290900 | 0.71150300  |
| H | -4.77290500 | -5.81771600 | 0.96475600  |
| C | -3.35880700 | -4.29005800 | 1.52690800  |
| H | -3.02344700 | -4.81229100 | 2.41858500  |
| C | -2.80139300 | -3.05280000 | 1.19665700  |
| H | -2.03382700 | -2.62122000 | 1.83516300  |
| N | 0.45122000  | -2.39781100 | -1.41340500 |
| P | 0.18098800  | 1.38890500  | 1.12746700  |

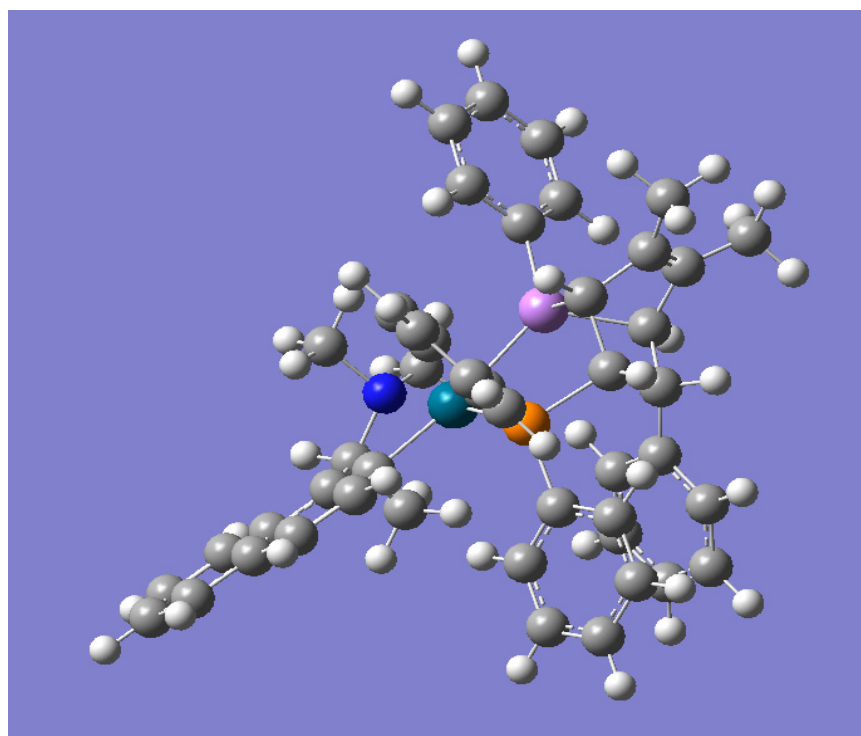

Optimized structure of *exo-(-)-7*

Gas phase energy: -4536.67167416 hartrees

Solvation (CH<sub>2</sub>Cl<sub>2</sub>) energy: -4536.72673908 hartrees

Gibbs free energy: -4535.954409 hartrees

|    |             |             |             |
|----|-------------|-------------|-------------|
| Pd | 0.43543800  | -0.68787400 | -0.07532000 |
| As | -2.11792300 | -0.78783400 | -0.20771600 |
| C  | 2.45073000  | -0.68247100 | 0.32659200  |
| C  | 3.11888800  | 0.06574900  | 1.33013400  |
| H  | 2.57777200  | 0.78388200  | 1.93615500  |
| C  | 4.46442800  | -0.11217500 | 1.56422400  |
| H  | 4.96317800  | 0.46733000  | 2.33793400  |
| C  | 5.22474500  | -1.04154500 | 0.80994500  |
| C  | 4.56796800  | -1.82063000 | -0.20065900 |
| C  | 3.16295400  | -1.62489100 | -0.40967200 |
| C  | 6.61564100  | -1.21973400 | 1.03870500  |
| H  | 7.09562700  | -0.62240800 | 1.80996800  |
| C  | 7.34432300  | -2.12556600 | 0.30296000  |
| H  | 8.40722900  | -2.25308900 | 0.48565900  |
| C  | 6.70449900  | -2.89447500 | -0.69765300 |
| H  | 7.28270400  | -3.60698800 | -1.27924300 |
| C  | 5.35670600  | -2.74697900 | -0.94335400 |
| H  | 4.90111300  | -3.34649600 | -1.72486100 |
| C  | 2.40311800  | -2.41716100 | -1.45260400 |
| H  | 2.83410900  | -3.41944600 | -1.58468600 |

|   |             |             |             |
|---|-------------|-------------|-------------|
| C | 2.43411300  | -1.69753600 | -2.80885400 |
| H | 2.01071700  | -2.29841400 | -3.61972100 |
| H | 3.47721900  | -1.48736500 | -3.06289200 |
| H | 1.90729600  | -0.73884200 | -2.75137800 |
| C | 1.02699000  | -3.63357600 | 0.17143200  |
| H | 0.02847200  | -3.72639000 | 0.60472500  |
| H | 1.72984600  | -3.31629700 | 0.94100400  |
| H | 1.33557000  | -4.61278600 | -0.22198300 |
| C | 0.07986300  | -3.12938000 | -1.97801200 |
| H | 0.49229700  | -4.03377300 | -2.44846300 |
| H | -0.07867500 | -2.36904500 | -2.74227100 |
| H | -0.88019300 | -3.37908500 | -1.52301500 |
| C | 0.05629700  | 1.44154000  | 2.63348700  |
| C | 0.17385800  | 2.61157400  | 3.40150300  |
| H | 0.26175200  | 3.58003500  | 2.92287500  |
| C | 0.20869300  | 2.54206200  | 4.79519800  |
| H | 0.30530200  | 3.45608500  | 5.37398600  |
| C | 0.12907200  | 1.30789700  | 5.44238100  |
| H | 0.16029000  | 1.25815500  | 6.52689600  |
| C | 0.02634200  | 0.13656300  | 4.68946000  |
| H | -0.01623100 | -0.82934300 | 5.18469900  |
| C | -0.00281800 | 0.20233400  | 3.29655000  |
| H | -0.04792200 | -0.71333600 | 2.71257700  |
| C | 0.86112800  | 2.93395500  | 0.21014100  |
| C | 2.05953400  | 2.78391000  | -0.50214200 |
| H | 2.43323900  | 1.79159900  | -0.72764800 |
| C | 2.77397200  | 3.90726600  | -0.92287000 |
| H | 3.70149500  | 3.77619800  | -1.47249800 |
| C | 2.30118200  | 5.18885200  | -0.64074100 |
| H | 2.86103700  | 6.06099400  | -0.96599500 |
| C | 1.10057300  | 5.34885200  | 0.05537600  |
| H | 0.72064900  | 6.34380500  | 0.26928100  |
| C | 0.38109700  | 4.23050600  | 0.47347100  |
| H | -0.56025000 | 4.37903100  | 0.99424900  |
| C | -1.88052200 | 1.78546400  | 0.46175500  |
| H | -2.12619600 | 2.72867000  | 0.96066300  |
| C | -2.33835200 | 1.84873900  | -1.06825800 |
| H | -3.07675600 | 2.65747600  | -1.09572200 |
| C | -1.32970600 | 2.18455300  | -2.15904200 |
| C | -0.63710700 | 1.21051400  | -2.89267300 |
| H | -0.77922500 | 0.15720600  | -2.67106000 |
| C | 0.22484000  | 1.57056600  | -3.93201400 |
| H | 0.73942800  | 0.79720200  | -4.49595700 |
| C | 0.41100900  | 2.91332700  | -4.25923400 |

|   |             |             |             |
|---|-------------|-------------|-------------|
| H | 1.07673700  | 3.19234300  | -5.07082100 |
| C | -0.28264400 | 3.89424200  | -3.54737900 |
| H | -0.16097600 | 4.94305900  | -3.80231800 |
| C | -1.14852500 | 3.52905800  | -2.51799000 |
| H | -1.69774400 | 4.30159200  | -1.98508400 |
| C | -3.16016500 | 0.52955900  | -1.31144700 |
| H | -3.29066200 | 0.30575300  | -2.37014100 |
| C | -4.44900900 | 0.67228900  | -0.51424600 |
| C | -5.75833400 | 0.81416300  | -1.23219700 |
| H | -6.59427800 | 0.96030200  | -0.54338300 |
| H | -5.97440600 | -0.07682100 | -1.83672900 |
| H | -5.74262900 | 1.66676800  | -1.92496900 |
| C | -4.19246200 | 0.76388500  | 0.80619800  |
| C | -5.14995400 | 1.00297600  | 1.93574000  |
| H | -4.90754100 | 1.92880800  | 2.47537800  |
| H | -5.10031800 | 0.18876100  | 2.67119400  |
| H | -6.18468500 | 1.07984800  | 1.59213100  |
| C | -2.70886700 | 0.61746700  | 1.09753400  |
| H | -2.46808000 | 0.44395500  | 2.14572300  |
| C | -3.22434400 | -2.36349500 | 0.02038100  |
| C | -4.09582300 | -2.79608600 | -0.98793500 |
| H | -4.20762100 | -2.22122000 | -1.90286400 |
| C | -4.83408600 | -3.96978700 | -0.82120200 |
| H | -5.51179000 | -4.29549900 | -1.60513600 |
| C | -4.70463600 | -4.71927100 | 0.34968400  |
| H | -5.28193300 | -5.63004900 | 0.47861300  |
| C | -3.83012800 | -4.29788400 | 1.35444400  |
| H | -3.72736700 | -4.87762200 | 2.26728100  |
| C | -3.08550000 | -3.12931600 | 1.18750700  |
| H | -2.40830400 | -2.81019900 | 1.97676400  |
| N | 0.99524600  | -2.62664100 | -0.92571200 |
| P | -0.04547900 | 1.44983000  | 0.78884500  |

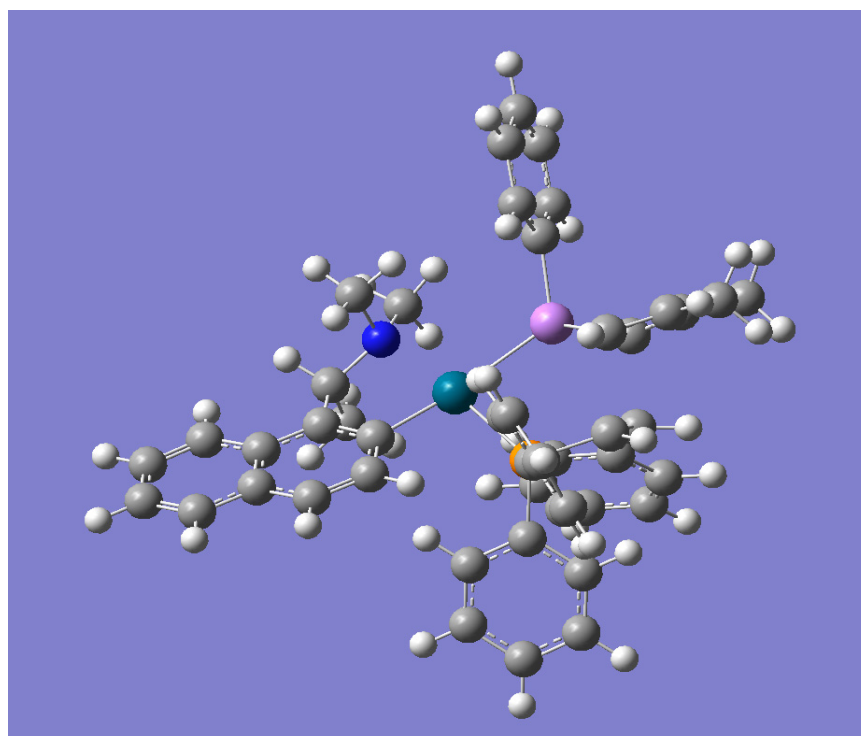

Transition state structure for TS-*cis*-Ph

Imaginary frequencies:  $-487.3538 \text{ cm}^{-1}$

Gas phase energy:  $-4536.60601774 \text{ hartrees}$

Solvation ( $\text{CH}_2\text{Cl}_2$ ) energy:  $-4536.66016035 \text{ hartrees}$

Gibbs free energy:  $-4535.894345 \text{ hartrees}$

|    |             |             |             |
|----|-------------|-------------|-------------|
| Pd | 0.47335400  | -0.63889000 | -0.01112000 |
| As | -2.09917900 | -0.69824000 | -0.20476600 |
| C  | 2.45208500  | -0.79288400 | 0.50881200  |
| C  | 3.08424600  | -0.18276800 | 1.62329000  |
| H  | 2.54178200  | 0.51017500  | 2.25588700  |
| C  | 4.39851700  | -0.46201200 | 1.92717200  |
| H  | 4.87024600  | 0.01190300  | 2.78506500  |
| C  | 5.16151500  | -1.35776300 | 1.13638800  |
| C  | 4.53952200  | -1.99574000 | 0.01112200  |
| C  | 3.16489500  | -1.69938900 | -0.26948400 |
| C  | 6.52153100  | -1.63760800 | 1.43746500  |
| H  | 6.97535600  | -1.14643300 | 2.29463000  |
| C  | 7.25322000  | -2.50892500 | 0.66419400  |
| H  | 8.29242800  | -2.71510400 | 0.90279000  |
| C  | 6.64789000  | -3.13880000 | -0.44894900 |
| H  | 7.22907400  | -3.82381200 | -1.05984700 |
| C  | 5.33055300  | -2.89009400 | -0.76737100 |
| H  | 4.90183400  | -3.38283500 | -1.63402400 |
| C  | 2.43678600  | -2.34488500 | -1.42862500 |

|   |             |             |             |
|---|-------------|-------------|-------------|
| H | 2.83128800  | -3.34913200 | -1.63736300 |
| C | 2.58416200  | -1.49887500 | -2.70224900 |
| H | 2.18069600  | -1.99246600 | -3.59129300 |
| H | 3.64954800  | -1.32133500 | -2.87612100 |
| H | 2.10191900  | -0.52295200 | -2.57802800 |
| C | 0.91730500  | -3.64619000 | -0.01433000 |
| H | -0.10647100 | -3.72992700 | 0.35595200  |
| H | 1.59048900  | -3.44376300 | 0.81818800  |
| H | 1.20254800  | -4.59636800 | -0.48847000 |
| C | 0.12811900  | -2.88849500 | -2.15576800 |
| H | 0.54390100  | -3.74981100 | -2.69851800 |
| H | 0.03862700  | -2.04314700 | -2.83760300 |
| H | -0.86354200 | -3.15638900 | -1.78930000 |
| C | 0.18254800  | 1.64689900  | 2.67826700  |
| C | 0.29653600  | 2.88522000  | 3.32924000  |
| H | 0.40549500  | 3.79880000  | 2.75357000  |
| C | 0.29055000  | 2.94968900  | 4.72348700  |
| H | 0.38238200  | 3.91319500  | 5.21648500  |
| C | 0.17716300  | 1.78249000  | 5.48164100  |
| H | 0.17815400  | 1.83637900  | 6.56645800  |
| C | 0.07760400  | 0.54479700  | 4.84258400  |
| H | 0.00727600  | -0.36798400 | 5.42734200  |
| C | 0.08455500  | 0.47664100  | 3.44877200  |
| H | 0.03760800  | -0.48974900 | 2.95282000  |
| C | 1.14970000  | 2.89225700  | 0.18078800  |
| C | 2.45544600  | 2.64870100  | -0.26909600 |
| H | 2.85556100  | 1.64174100  | -0.25593700 |
| C | 3.24535200  | 3.70005400  | -0.73761000 |
| H | 4.25568700  | 3.49808800  | -1.08172200 |
| C | 2.74044400  | 5.00055700  | -0.76966900 |
| H | 3.35660100  | 5.81608600  | -1.13724300 |
| C | 1.43610200  | 5.24948700  | -0.33723700 |
| H | 1.03205200  | 6.25723800  | -0.37076700 |
| C | 0.64252600  | 4.20266900  | 0.13056000  |
| H | -0.37802000 | 4.40636900  | 0.44025600  |
| C | -1.62298200 | 2.02117100  | 0.50522600  |
| H | -2.06410600 | 2.57690800  | 1.32611200  |
| C | -2.22689800 | 2.21440700  | -0.77743300 |
| H | -3.09724800 | 2.86185800  | -0.69861100 |
| C | -1.57436800 | 2.42220700  | -2.10759900 |
| C | -0.47397200 | 1.70047000  | -2.59930200 |
| H | -0.01597800 | 0.92298800  | -1.99483000 |
| C | 0.05207500  | 1.96711400  | -3.86325100 |
| H | 0.90924400  | 1.39964100  | -4.21598200 |



|   |             |             |             |
|---|-------------|-------------|-------------|
| C | -0.51153400 | 2.95459500  | -4.67323600 |
| H | -0.09873500 | 3.15933900  | -5.65665100 |
| C | -1.61145700 | 3.67458500  | -4.20518000 |
| H | -2.06376700 | 4.44572700  | -4.82225700 |
| C | -2.13634000 | 3.40631300  | -2.94187300 |
| H | -2.99413600 | 3.97535100  | -2.59074100 |
| C | -3.34856800 | 0.48931000  | -1.14021600 |
| H | -3.46337400 | 0.47718500  | -2.21929900 |
| C | -4.46191600 | 0.69046400  | -0.29578400 |
| C | -5.77724100 | 1.21870100  | -0.80372600 |
| H | -6.61114000 | 0.60668600  | -0.43859700 |
| H | -5.81590000 | 1.22290400  | -1.89623000 |
| H | -5.96550300 | 2.24351400  | -0.45409200 |
| C | -4.16860800 | 0.57252000  | 1.08376100  |
| C | -5.13558700 | 0.99627600  | 2.15974700  |
| H | -5.41301300 | 2.05479100  | 2.06659900  |
| H | -4.71553300 | 0.84407000  | 3.15760900  |
| H | -6.06685800 | 0.41970100  | 2.09821700  |
| C | -2.85228600 | 0.18299900  | 1.34666500  |
| H | -2.47316000 | 0.05682300  | 2.35436500  |
| C | -3.04410500 | -2.41424100 | -0.24955900 |
| C | -3.69535600 | -2.85634800 | -1.40925400 |
| H | -3.73647000 | -2.22397200 | -2.29192900 |
| C | -4.30963100 | -4.11055200 | -1.43841600 |
| H | -4.81858300 | -4.43986100 | -2.33991000 |
| C | -4.27531500 | -4.93465100 | -0.31174200 |
| H | -4.75573300 | -5.90838800 | -0.33464400 |
| C | -3.62183800 | -4.50376700 | 0.84508200  |
| H | -3.59527400 | -5.13911300 | 1.72589700  |
| C | -3.00401300 | -3.25178900 | 0.87454200  |
| H | -2.50548100 | -2.92566100 | 1.78426500  |
| N | 0.99267800  | -2.53602800 | -1.00412000 |
| P | 0.10508400  | 1.52556400  | 0.84223700  |

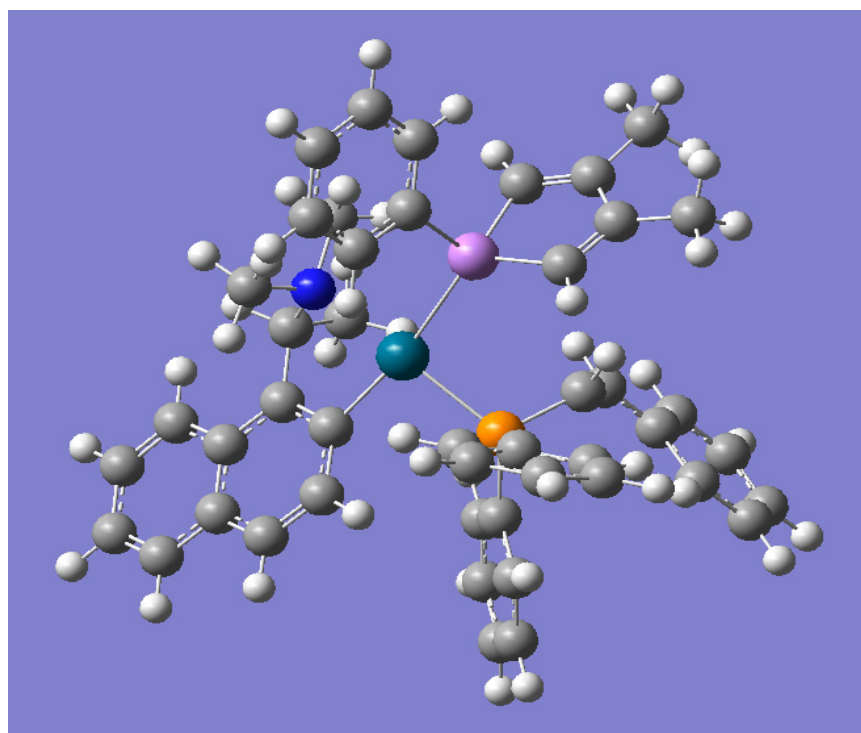

Transition state structure for TS-Ph-1

Imaginary frequencies:  $-922.5814 \text{ cm}^{-1}$

Gas phase energy:  $-4536.58084019 \text{ hartrees}$

Solvation ( $\text{CH}_2\text{Cl}_2$ ) energy:  $-4536.60222339 \text{ hartrees}$

Gibbs free energy:  $-4535.881383 \text{ hartrees}$

|    |             |             |             |
|----|-------------|-------------|-------------|
| Pd | 0.12042600  | -0.67149000 | -0.04361900 |
| As | -2.51506400 | -0.74554100 | -0.12935300 |
| C  | 2.12750100  | -0.99696800 | 0.13380200  |
| C  | 2.90025300  | -0.78268600 | 1.30191800  |
| H  | 2.46532400  | -0.31114100 | 2.17598500  |
| C  | 4.22083800  | -1.17151400 | 1.34656100  |
| H  | 4.80431600  | -1.01210400 | 2.25042700  |
| C  | 4.84871400  | -1.76919200 | 0.22412000  |
| C  | 4.07568500  | -2.01202700 | -0.96078100 |
| C  | 2.69221900  | -1.63761500 | -0.96183000 |
| C  | 6.22000700  | -2.14003300 | 0.25214500  |
| H  | 6.79072400  | -1.95155500 | 1.15809100  |
| C  | 6.81893800  | -2.72273000 | -0.84085700 |
| H  | 7.86831800  | -3.00054600 | -0.80864300 |
| C  | 6.06369000  | -2.96013100 | -2.01369200 |
| H  | 6.54087300  | -3.41610700 | -2.87660100 |
| C  | 4.73074500  | -2.61616400 | -2.07279300 |
| H  | 4.18345500  | -2.79999300 | -2.99185800 |
| C  | 1.77674900  | -1.95624900 | -2.12413200 |

|   |             |             |             |
|---|-------------|-------------|-------------|
| H | 2.12363700  | -2.84922900 | -2.66286500 |
| C | 1.70433300  | -0.79139400 | -3.12213200 |
| H | 1.16857500  | -1.05050000 | -4.04044600 |
| H | 2.72392000  | -0.51005200 | -3.40206800 |
| H | 1.23015200  | 0.08358600  | -2.66311000 |
| C | 0.51982500  | -3.63129800 | -0.84614100 |
| H | -0.42836500 | -3.84759300 | -0.35139200 |
| H | 1.31763000  | -3.60661300 | -0.10507700 |
| H | 0.73139200  | -4.42351300 | -1.57882800 |
| C | -0.61735000 | -2.42244700 | -2.57645700 |
| H | -0.30653700 | -3.13019200 | -3.35914500 |
| H | -0.81052700 | -1.45049800 | -3.02970600 |
| H | -1.53707900 | -2.79710100 | -2.12187800 |
| C | -0.66726100 | 1.18267800  | 2.80203400  |
| C | -1.35865300 | 2.25344700  | 3.39331400  |
| H | -1.42974900 | 3.20726900  | 2.87840300  |
| C | -1.95739800 | 2.09786900  | 4.64450900  |
| H | -2.49154700 | 2.93048400  | 5.09324500  |
| C | -1.86595400 | 0.87793100  | 5.31953200  |
| H | -2.33062400 | 0.76065900  | 6.29422400  |
| C | -1.17656200 | -0.18997600 | 4.74070700  |
| H | -1.10309600 | -1.13923000 | 5.26343300  |
| C | -0.58415600 | -0.04082900 | 3.48583200  |
| H | -0.05694500 | -0.87585100 | 3.03176500  |
| C | 1.71830400  | 2.23776400  | 1.42532600  |
| C | 2.56844900  | 2.45219600  | 0.32873100  |
| H | 2.31442600  | 2.05063200  | -0.64690900 |
| C | 3.75221500  | 3.16896700  | 0.49011200  |
| H | 4.40167900  | 3.33334300  | -0.36463200 |
| C | 4.10763900  | 3.66331700  | 1.74778900  |
| H | 5.03481000  | 4.21518000  | 1.87264200  |
| C | 3.27277500  | 3.44233900  | 2.84339300  |
| H | 3.54662600  | 3.81989700  | 3.82440000  |
| C | 2.07872600  | 2.73505000  | 2.68630500  |
| H | 1.43739700  | 2.57346500  | 3.54623400  |
| C | -0.90248500 | 2.50334300  | 0.23455700  |
| H | -1.97121900 | 2.40617300  | 0.44475900  |
| C | -0.46369700 | 3.24518400  | -0.94214200 |
| H | -0.49472800 | 2.71748000  | -1.89928300 |
| C | -0.07267600 | 4.61052900  | -0.97413700 |
| C | -0.01463400 | 5.42108700  | 0.19525500  |
| H | -0.26390800 | 4.98075600  | 1.15629800  |
| C | 0.36036800  | 6.75388100  | 0.11962600  |
| H | 0.39807800  | 7.35428200  | 1.02444600  |

|   |             |             |             |
|---|-------------|-------------|-------------|
| C | 0.69095900  | 7.33154300  | -1.11447200 |
| H | 0.98282500  | 8.37609900  | -1.16736100 |
| C | 0.64247100  | 6.55329100  | -2.28005300 |
| H | 0.89713700  | 6.99659600  | -3.23865700 |
| C | 0.26931800  | 5.21993700  | -2.21614000 |
| H | 0.23068800  | 4.62145200  | -3.12324900 |
| C | -3.48236700 | -0.23591600 | -1.71752500 |
| H | -3.25274400 | -0.58003000 | -2.71908700 |
| C | -4.43525900 | 0.67960500  | -1.43435200 |
| C | -5.30848000 | 1.32957400  | -2.47385900 |
| H | -6.37030700 | 1.13351600  | -2.27987800 |
| H | -5.07354200 | 0.96225600  | -3.47623200 |
| H | -5.18329800 | 2.41966900  | -2.47271500 |
| C | -4.58538500 | 1.02697400  | 0.01181100  |
| C | -5.64840800 | 1.99282800  | 0.46427700  |
| H | -5.61945200 | 2.13257900  | 1.54803500  |
| H | -6.65001600 | 1.63386100  | 0.19665300  |
| H | -5.52683300 | 2.97472000  | -0.01013800 |
| C | -3.72567200 | 0.40616100  | 0.84736300  |
| H | -3.70915100 | 0.53294900  | 1.92335100  |
| C | -3.18991500 | -2.52180900 | 0.33677400  |
| C | -4.35196600 | -3.04317600 | -0.24598700 |
| H | -4.89000200 | -2.47000700 | -0.99447100 |
| C | -4.82322900 | -4.29947400 | 0.13881800  |
| H | -5.72314000 | -4.69954000 | -0.31978600 |
| C | -4.14484700 | -5.03826800 | 1.11121200  |
| H | -4.51520500 | -6.01491400 | 1.40891900  |
| C | -2.99029700 | -4.51917000 | 1.70013300  |
| H | -2.46107400 | -5.08757900 | 2.45982200  |
| C | -2.51153500 | -3.26560100 | 1.31156000  |
| H | -1.61165600 | -2.86642000 | 1.77320200  |
| N | 0.42532700  | -2.31238900 | -1.53096200 |
| P | 0.13587200  | 1.34659000  | 1.16289000  |

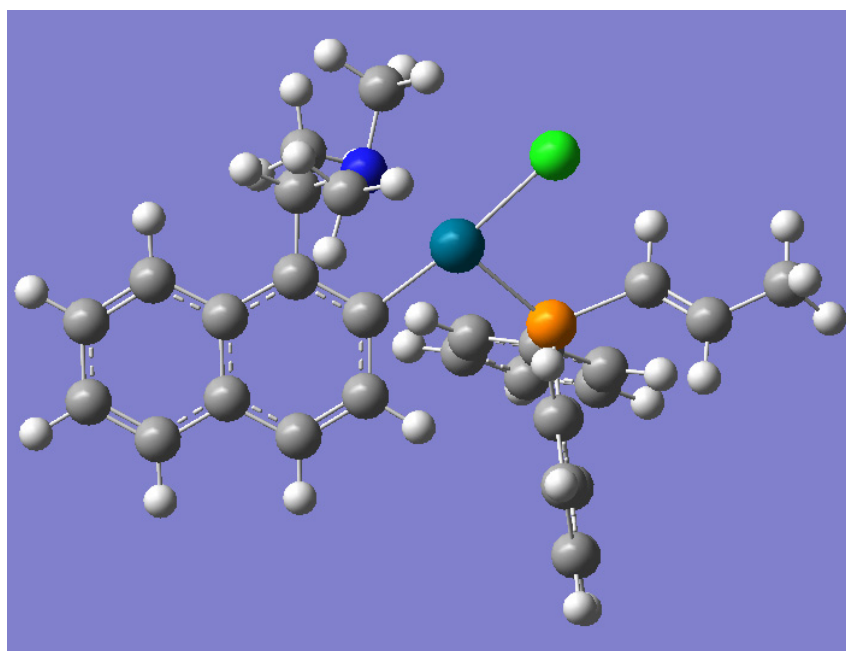

Optimized structure of *trans*-(+)-**11**

Gas phase energy: -2106.83566401 hartrees

Solvation (CH<sub>2</sub>Cl<sub>2</sub>) energy: -2106.86501579 hartrees

Gibbs free energy: -2106.373446 hartrees

|    |             |             |             |
|----|-------------|-------------|-------------|
| Pd | 0.00000000  | 0.00000000  | 0.00000000  |
| Cl | 2.45334555  | 0.00000000  | 0.00000000  |
| N  | -0.08557930 | 2.19667276  | 0.00000000  |
| P  | -0.02138420 | -2.32967976 | -0.15214540 |
| C  | -2.01645914 | 0.27967946  | 0.19274516  |
| C  | -2.97394177 | -0.63622851 | 0.70822354  |
| H  | -2.67116371 | -1.63779848 | 0.99063403  |
| C  | -4.29469553 | -0.28368893 | 0.87143354  |
| H  | -5.00708119 | -1.00366890 | 1.26988100  |
| C  | -4.75515872 | 1.01115969  | 0.52433684  |
| C  | -6.11845209 | 1.38183897  | 0.67263181  |
| H  | -6.81559619 | 0.64414555  | 1.06404476  |
| C  | -6.55504644 | 2.64091713  | 0.32922069  |
| H  | -7.60091955 | 2.91162918  | 0.44581353  |
| C  | -5.63347861 | 3.58632142  | -0.17970843 |
| H  | -5.97824379 | 4.58004346  | -0.45391468 |
| C  | -4.30363846 | 3.25858447  | -0.33315299 |
| H  | -3.62520162 | 4.00440761  | -0.73466807 |
| C  | -3.81217684 | 1.96530213  | 0.01360623  |
| C  | -2.44178354 | 1.56915332  | -0.12775992 |
| C  | -1.39863369 | 2.52852872  | -0.66480199 |
| H  | -1.63586944 | 3.56839871  | -0.39372736 |

|   |             |             |             |
|---|-------------|-------------|-------------|
| C | -1.32679599 | 2.43642656  | -2.19786089 |
| H | -0.95104836 | 1.45396230  | -2.50379594 |
| H | -0.69625424 | 3.21374421  | -2.64005597 |
| H | -2.33693155 | 2.55321991  | -2.60242178 |
| C | -0.11097649 | 2.63423786  | 1.41932750  |
| H | 0.80279736  | 2.29035284  | 1.90798097  |
| H | -0.97589389 | 2.20405262  | 1.92413205  |
| H | -0.16361690 | 3.73254626  | 1.47832217  |
| C | 1.05818638  | 2.86508858  | -0.66174789 |
| H | 1.19769068  | 2.47444672  | -1.66791128 |
| H | 1.96261595  | 2.64701846  | -0.09612551 |
| H | 0.88640668  | 3.95232491  | -0.70078260 |
| C | 3.53139881  | -4.61365655 | 0.19842980  |
| H | 4.05565087  | -4.13462377 | -0.63389682 |
| H | 3.50426597  | -5.69681636 | 0.01817050  |
| H | 4.12611814  | -4.46042744 | 1.10889332  |
| C | 2.14640985  | -4.06097550 | 0.37753862  |
| H | 1.55786430  | -4.49980251 | 1.18237999  |
| C | 1.63045858  | -3.06938780 | -0.35891013 |
| H | 2.22459407  | -2.59346793 | -1.13517446 |
| C | -0.69596232 | -3.17169086 | 1.34246216  |
| C | -0.29600201 | -2.67599112 | 2.59552646  |
| H | 0.36660028  | -1.81562873 | 2.64504216  |
| C | -0.74813887 | -3.27789200 | 3.76888960  |
| H | -0.43043362 | -2.88681731 | 4.73157318  |
| C | -1.61538717 | -4.37223303 | 3.70652202  |
| H | -1.97446316 | -4.83544265 | 4.62162943  |
| C | -2.02341981 | -4.86460020 | 2.46648897  |
| H | -2.70124737 | -5.71232478 | 2.41198203  |
| C | -1.56475007 | -4.27042905 | 1.28767710  |
| H | -1.89054247 | -4.66039024 | 0.32862296  |
| C | -0.94692225 | -3.00885438 | -1.59989436 |
| C | -0.67138903 | -4.30193516 | -2.07805523 |
| H | 0.09830517  | -4.90016405 | -1.60015596 |
| C | -1.36630597 | -4.81529322 | -3.17339841 |
| H | -1.14165147 | -5.81609692 | -3.53266552 |
| C | -2.33863524 | -4.04176491 | -3.81144827 |
| H | -2.87553926 | -4.44003473 | -4.66832615 |
| C | -2.61038854 | -2.75267566 | -3.35119208 |
| H | -3.35955458 | -2.14210765 | -3.84787666 |
| C | -1.91786556 | -2.23618886 | -2.25422207 |
| H | -2.12888375 | -1.23175162 | -1.90447039 |

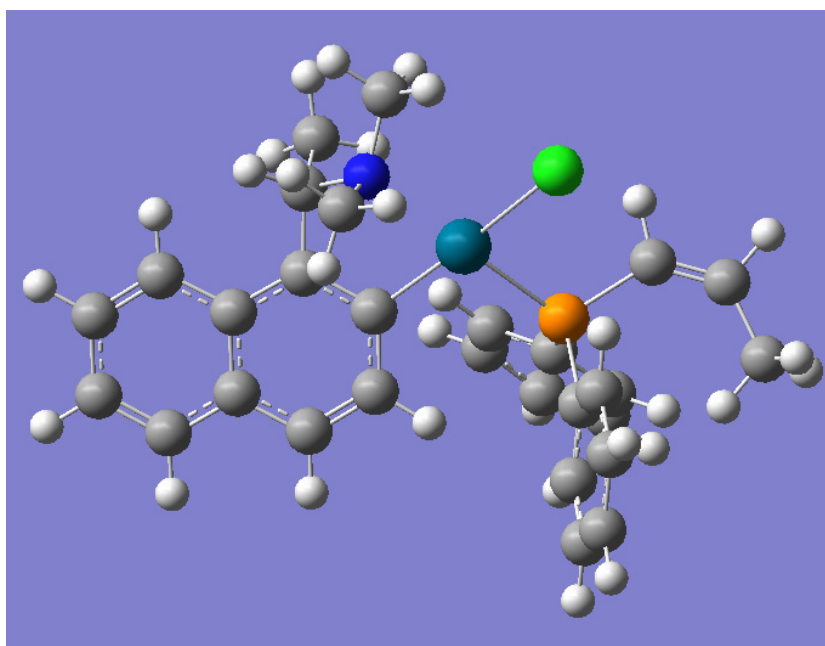

Optimized structure of *cis*-(+)-**11**

Gas phase energy: -2106.84313778 hartrees

Solvation (CH<sub>2</sub>Cl<sub>2</sub>) energy: -2106.85737766 hartrees

Gibbs free energy: -2106.382057 hartrees

|    |             |             |             |
|----|-------------|-------------|-------------|
| Pd | 0.00000000  | 0.00000000  | 0.00000000  |
| Cl | 2.46474751  | 0.00000000  | 0.00000000  |
| N  | -0.10654762 | 2.19201619  | 0.00000000  |
| P  | 0.00957505  | -2.32863742 | -0.15582892 |
| C  | -1.98778075 | 0.25821130  | 0.34695048  |
| C  | -2.86214846 | -0.66339654 | 0.98367328  |
| H  | -2.50860142 | -1.65432513 | 1.24787011  |
| C  | -4.15774488 | -0.32258344 | 1.29963040  |
| H  | -4.80857586 | -1.04213011 | 1.79271390  |
| C  | -4.67172655 | 0.96305204  | 0.99235191  |
| C  | -6.01240362 | 1.32093128  | 1.29605780  |
| H  | -6.65111238 | 0.57955503  | 1.77126663  |
| C  | -6.49989934 | 2.57324802  | 0.99863694  |
| H  | -7.52781400 | 2.83390072  | 1.23562703  |
| C  | -5.65495975 | 3.52476528  | 0.38025761  |
| H  | -6.04038915 | 4.51300415  | 0.14291623  |
| C  | -4.34847380 | 3.20965199  | 0.07455897  |
| H  | -3.72922675 | 3.95931672  | -0.40761883 |
| C  | -3.80634484 | 1.92398394  | 0.36875997  |
| C  | -2.45625058 | 1.54258134  | 0.07555529  |
| C  | -1.47561875 | 2.51365796  | -0.55087900 |
| H  | -1.69911130 | 3.54998372  | -0.25614375 |

|   |             |             |             |
|---|-------------|-------------|-------------|
| C | -1.53686485 | 2.42825502  | -2.08418276 |
| H | -1.18547496 | 1.44907573  | -2.42734708 |
| H | -0.95146579 | 3.21113526  | -2.57572809 |
| H | -2.57914506 | 2.54207773  | -2.39783338 |
| C | -0.00950482 | 2.64054485  | 1.41304591  |
| H | 0.93932978  | 2.29248632  | 1.82581860  |
| H | -0.83193360 | 2.22063283  | 1.99244716  |
| H | -0.05085648 | 3.73953153  | 1.46790689  |
| C | 0.97884020  | 2.84938515  | -0.76324078 |
| H | 1.01971359  | 2.46073253  | -1.77960941 |
| H | 1.92826368  | 2.61819956  | -0.28191711 |
| H | 0.81918128  | 3.93884944  | -0.78700008 |
| C | 2.11191210  | -5.19862976 | 0.10166775  |
| H | 1.22628918  | -5.14234060 | 0.73493756  |
| H | 2.98937718  | -5.27833235 | 0.75769908  |
| H | 2.07111223  | -6.13255778 | -0.47556049 |
| C | 2.26773471  | -4.03026065 | -0.82742119 |
| H | 3.14130993  | -4.10193779 | -1.47872765 |
| C | 1.53109546  | -2.92052490 | -0.98340513 |
| H | 1.86767311  | -2.19061134 | -1.71425661 |
| C | -0.04311519 | -3.06106821 | 1.53130512  |
| C | 0.98789468  | -2.69217251 | 2.41505440  |
| H | 1.78070702  | -2.03235812 | 2.07106032  |
| C | 0.98706032  | -3.16362562 | 3.72636666  |
| H | 1.79052320  | -2.87654749 | 4.39932388  |
| C | -0.04408222 | -3.99327574 | 4.17806228  |
| H | -0.04372016 | -4.35512649 | 5.20273611  |
| C | -1.07635158 | -4.34933383 | 3.31079564  |
| H | -1.88472715 | -4.98838415 | 3.65619125  |
| C | -1.07909032 | -3.88595991 | 1.99163813  |
| H | -1.88649862 | -4.17497446 | 1.32620719  |
| C | -1.31852952 | -3.13818153 | -1.15234339 |
| C | -1.36036889 | -4.53712470 | -1.29193499 |
| H | -0.63426373 | -5.15834612 | -0.77734910 |
| C | -2.32559519 | -5.14070122 | -2.09620649 |
| H | -2.34857623 | -6.22316593 | -2.18987227 |
| C | -3.25273435 | -4.35579271 | -2.78765430 |
| H | -4.00145863 | -4.82702612 | -3.41882859 |
| C | -3.20816230 | -2.96716667 | -2.67015763 |
| H | -3.92168592 | -2.34963474 | -3.20878951 |
| C | -2.24741812 | -2.36042409 | -1.85694753 |
| H | -2.22038806 | -1.28062337 | -1.76196731 |



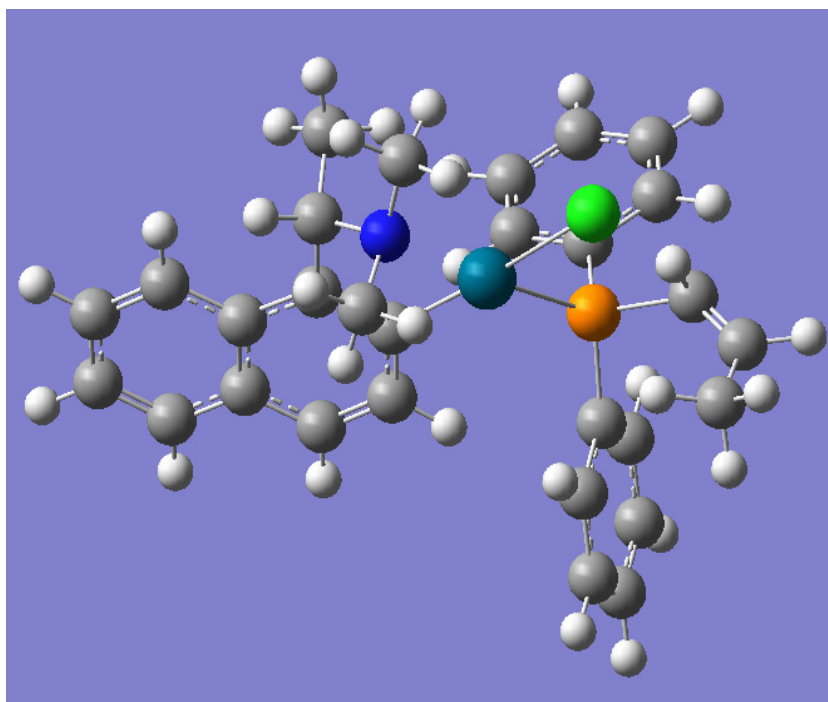

Transition state structure for TS-Me-2

Imaginary frequencies:  $-1027.4717 \text{ cm}^{-1}$

Gas phase energy:  $-2106.71375418 \text{ hartrees}$

Solvation ( $\text{CH}_2\text{Cl}_2$ ) energy:  $-2106.72776685 \text{ hartrees}$

Gibbs free energy:  $-2106.259998 \text{ hartrees}$

|    |             |             |             |
|----|-------------|-------------|-------------|
| Pd | -0.01352300 | -0.17227200 | -0.07800400 |
| Cl | 2.45298200  | -0.37754800 | -0.53454800 |
| N  | 0.02128300  | 2.04048300  | -0.22920600 |
| P  | -0.09061300 | -2.51619800 | -0.10735100 |
| C  | -1.97051900 | 0.23623800  | 0.31550200  |
| C  | -2.91743500 | -0.57670900 | 0.99489900  |
| H  | -2.63949700 | -1.56860200 | 1.32766300  |
| C  | -4.19614600 | -0.13379600 | 1.25155300  |
| H  | -4.90110700 | -0.77673000 | 1.77519200  |
| C  | -4.62128100 | 1.15399900  | 0.84143000  |
| C  | -5.94090500 | 1.61705200  | 1.09164300  |
| H  | -6.63069000 | 0.95649300  | 1.61239300  |
| C  | -6.34457400 | 2.86838400  | 0.68615400  |
| H  | -7.35687000 | 3.21100700  | 0.88256100  |
| C  | -5.43319400 | 3.71095500  | 0.00665000  |
| H  | -5.75264300 | 4.69781000  | -0.31830700 |
| C  | -4.14576400 | 3.29177600  | -0.25001600 |
| H  | -3.47711900 | 3.96025800  | -0.78239400 |
| C  | -3.68740300 | 2.00405900  | 0.15894600  |
| C  | -2.35934300 | 1.51823400  | -0.07783800 |

|   |             |             |             |
|---|-------------|-------------|-------------|
| C | -1.33394400 | 2.37276600  | -0.79880100 |
| H | -1.50389200 | 3.44315200  | -0.60688500 |
| C | -1.41370900 | 2.13851000  | -2.31604800 |
| H | -1.12278100 | 1.11139500  | -2.56106200 |
| H | -0.78962700 | 2.83488500  | -2.88448900 |
| H | -2.45065400 | 2.27995600  | -2.63575600 |
| C | 0.14135600  | 2.59277400  | 1.14259700  |
| H | 1.07921600  | 2.24724200  | 1.58300500  |
| H | -0.69169700 | 2.24858500  | 1.75513500  |
| H | 0.14014900  | 3.69399200  | 1.11498500  |
| C | 1.12347600  | 2.59652000  | -1.04521500 |
| H | 1.16471100  | 2.10774000  | -2.01692200 |
| H | 2.06777100  | 2.40406100  | -0.53634600 |
| H | 0.99049200  | 3.68211400  | -1.17812000 |
| C | 2.79495300  | -2.87637200 | 2.05967100  |
| H | 2.38768900  | -1.86280700 | 2.06739200  |
| H | 3.88113300  | -2.85045300 | 2.21021900  |
| H | 2.36742300  | -3.43520200 | 2.90803400  |
| C | 2.41940700  | -3.62824400 | 0.81497800  |
| H | 3.07418700  | -4.50065900 | 0.64517100  |
| C | 1.48754900  | -3.32738900 | -0.15003200 |
| H | 2.18378500  | -2.31958500 | -0.25235000 |
| C | -0.94628600 | -3.41822100 | 1.25769800  |
| C | -0.80930300 | -2.94619700 | 2.57387800  |
| H | -0.27702500 | -2.01627900 | 2.75751300  |
| C | -1.37289300 | -3.64793500 | 3.63913400  |
| H | -1.26818400 | -3.26766100 | 4.65186600  |
| C | -2.08004300 | -4.83030500 | 3.40240800  |
| H | -2.52212400 | -5.37576100 | 4.23190900  |
| C | -2.22206400 | -5.30427000 | 2.09754500  |
| H | -2.77314500 | -6.22161700 | 1.90780100  |
| C | -1.65971100 | -4.60279400 | 1.02808800  |
| H | -1.77520000 | -4.97608700 | 0.01559400  |
| C | -0.95327500 | -3.07334700 | -1.64799200 |
| C | -0.36389800 | -4.03289500 | -2.48151000 |
| H | 0.60845900  | -4.42764600 | -2.20076200 |
| C | -1.01644600 | -4.45164700 | -3.64359400 |
| H | -0.54808600 | -5.19307000 | -4.28617200 |
| C | -2.26175100 | -3.91972900 | -3.98111900 |
| H | -2.76783500 | -4.24519900 | -4.88650600 |
| C | -2.85311000 | -2.96041500 | -3.15433600 |
| H | -3.82032500 | -2.53762800 | -3.41375300 |
| C | -2.20134200 | -2.53223200 | -1.99775000 |
| H | -2.66270300 | -1.77443100 | -1.37238000 |

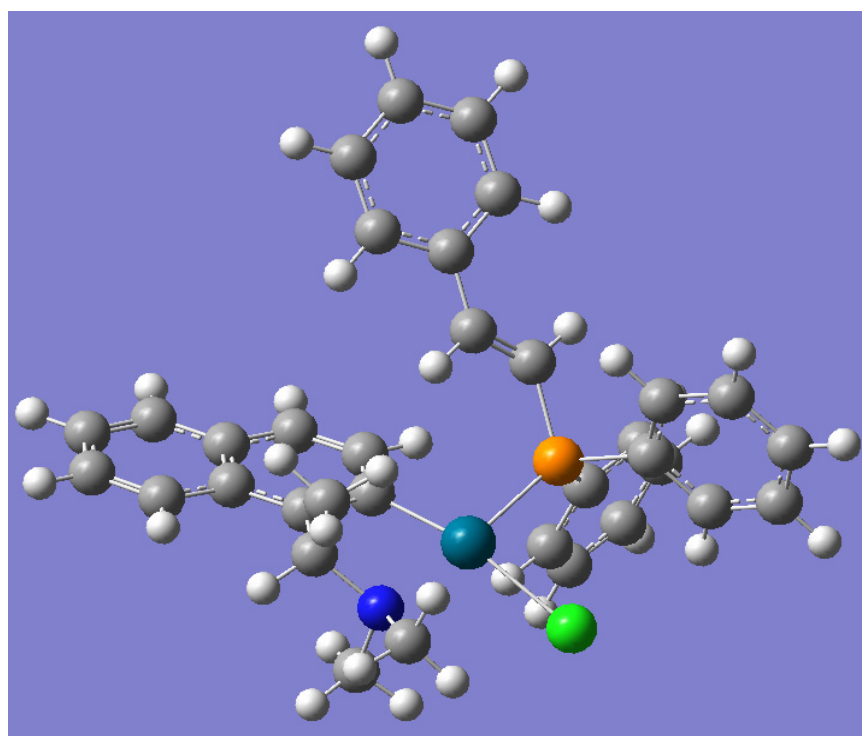

Optimized structure of *trans*-(+)-**12**

Gas phase energy: -2298.57788142 hartrees

Solvation (CH<sub>2</sub>Cl<sub>2</sub>) energy: -2298.60385457 hartrees

Gibbs free energy: -2298.069634 hartrees

|   |            |             |             |
|---|------------|-------------|-------------|
| C | 1.45567200 | -0.65106400 | 0.39150000  |
| C | 1.56187700 | 0.23280500  | 1.50088900  |
| H | 0.66549300 | 0.61323500  | 1.97917300  |
| C | 2.78691700 | 0.62031400  | 1.99447500  |
| H | 2.84523900 | 1.29487000  | 2.84647300  |
| C | 3.99239300 | 0.15917400  | 1.40570600  |
| C | 5.26245100 | 0.57157700  | 1.89001500  |
| H | 5.29665200 | 1.26100200  | 2.73078300  |
| C | 6.42653100 | 0.11547700  | 1.31424300  |
| H | 7.39168600 | 0.43956000  | 1.69393300  |
| C | 6.36261400 | -0.78079200 | 0.22145800  |
| H | 7.28164100 | -1.13974300 | -0.23468600 |
| C | 5.14600200 | -1.20163000 | -0.27108000 |
| H | 5.13157100 | -1.88231500 | -1.11633800 |
| C | 3.91850500 | -0.75233400 | 0.29892200  |
| C | 2.62619400 | -1.15495400 | -0.17279000 |
| C | 2.46935900 | -2.13904300 | -1.31513000 |
| H | 3.30907800 | -2.84939800 | -1.34599200 |
| C | 2.42074700 | -1.40003700 | -2.66216500 |

|   |             |             |             |
|---|-------------|-------------|-------------|
| H | 1.52042100  | -0.77959500 | -2.72880700 |
| H | 2.44998100  | -2.07953500 | -3.51934200 |
| H | 3.29166300  | -0.74041200 | -2.72789600 |
| C | 1.48076200  | -3.92177600 | 0.04998700  |
| H | 0.54100800  | -4.41433500 | 0.30713700  |
| H | 1.86757500  | -3.39755500 | 0.92437600  |
| H | 2.21382400  | -4.67713600 | -0.27310200 |
| C | 0.77708500  | -3.71267400 | -2.23508200 |
| H | 1.59159400  | -4.35719900 | -2.60140700 |
| H | 0.46142800  | -3.03215400 | -3.02428600 |
| H | -0.08461600 | -4.31698700 | -1.95452300 |
| C | -1.11880800 | 1.93695300  | 0.09142700  |
| H | -1.75233700 | 2.69175900  | 0.55612200  |
| C | 0.00462100  | 2.29017700  | -0.55697300 |
| H | 0.62426400  | 1.49689700  | -0.97136800 |
| C | 0.52937400  | 3.65054500  | -0.74423600 |
| C | 1.85189100  | 3.80228900  | -1.19775400 |
| H | 2.44755400  | 2.91489400  | -1.39718100 |
| C | 2.40901400  | 5.06760400  | -1.37646800 |
| H | 3.43511700  | 5.16179400  | -1.72124000 |
| C | 1.64894300  | 6.20854300  | -1.11433000 |
| H | 2.07822900  | 7.19649300  | -1.25698300 |
| C | 0.32821000  | 6.07418600  | -0.67370900 |
| H | -0.27190500 | 6.95868100  | -0.47735300 |
| C | -0.22632200 | 4.81069900  | -0.49181600 |
| H | -1.25882300 | 4.72321000  | -0.16567500 |
| C | -3.25835600 | 0.30641900  | -0.79944500 |
| C | -3.29222500 | 1.10752900  | -1.94963100 |
| H | -2.42615800 | 1.70160500  | -2.22486500 |
| C | -4.43909700 | 1.15342000  | -2.74424100 |
| H | -4.45295000 | 1.77981000  | -3.63231700 |
| C | -5.56191500 | 0.40148100  | -2.39676700 |
| H | -6.45553100 | 0.43852000  | -3.01424800 |
| C | -5.53176700 | -0.40262800 | -1.25522100 |
| H | -6.39843800 | -0.99957500 | -0.98487200 |
| C | -4.38618600 | -0.45707900 | -0.46272800 |
| H | -4.36529700 | -1.10235000 | 0.40814200  |
| C | -2.34919100 | 0.13047400  | 1.95309300  |
| C | -3.28092300 | 1.06070300  | 2.44425400  |
| H | -3.67982200 | 1.83173300  | 1.79045600  |
| C | -3.72022500 | 0.98873700  | 3.76507400  |
| H | -4.44171900 | 1.71278500  | 4.13411700  |
| C | -3.23953600 | -0.01634100 | 4.60959900  |
| H | -3.58508600 | -0.07263700 | 5.63839300  |

|    |             |             |             |
|----|-------------|-------------|-------------|
| C  | -2.32288700 | -0.95050900 | 4.12716000  |
| H  | -1.95345500 | -1.73967200 | 4.77618000  |
| C  | -1.87904100 | -0.87851900 | 2.80448700  |
| H  | -1.17315400 | -1.61060700 | 2.42291100  |
| Cl | -2.13855000 | -2.96517000 | -0.86401500 |
| N  | 1.22455100  | -2.95229900 | -1.04542400 |
| P  | -1.72521000 | 0.22211200  | 0.22269000  |
| Pd | -0.25215600 | -1.49786300 | -0.32230800 |

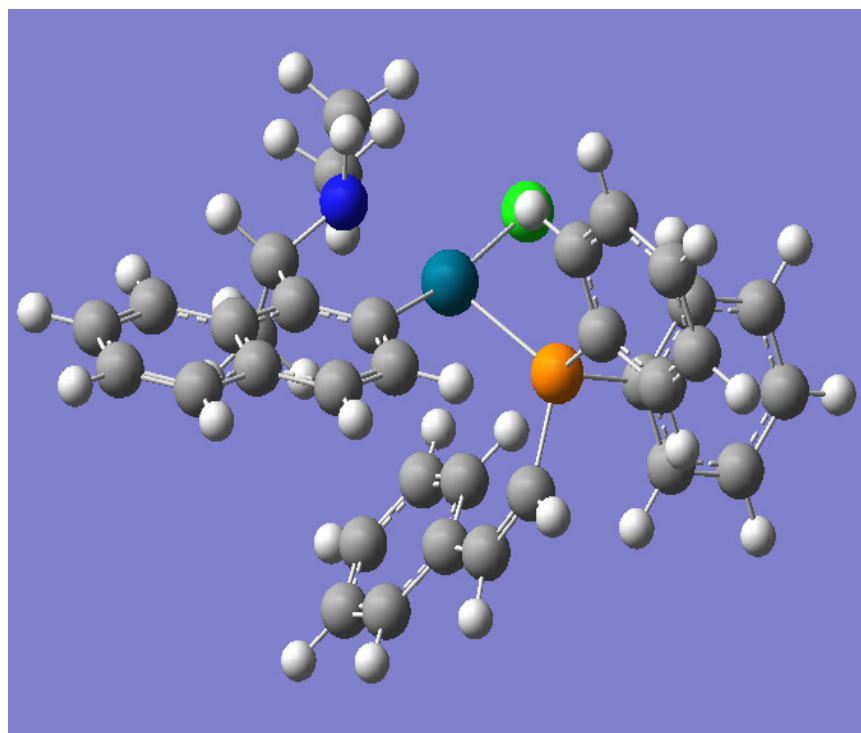

Optimized structure of *cis*-(+)-12

Gas phase energy: -2298.57075849 hartrees

Solvation (CH<sub>2</sub>Cl<sub>2</sub>) energy: -2298.59561611 hartrees

Gibbs free energy: -2298.060346 hartrees

|   |            |             |             |
|---|------------|-------------|-------------|
| C | 1.57015100 | 0.65132200  | 0.01199900  |
| C | 1.52805800 | 1.68303400  | -0.96575000 |
| H | 0.57792400 | 2.09944200  | -1.27726100 |
| C | 2.67394700 | 2.19559500  | -1.52963400 |
| H | 2.61054700 | 2.98921200  | -2.27187800 |
| C | 3.95203600 | 1.70731800  | -1.16029200 |
| C | 5.14261200 | 2.22207400  | -1.73925000 |
| H | 5.05701300 | 3.01105500  | -2.48338800 |
| C | 6.37831700 | 1.73857300  | -1.37425100 |
| H | 7.28177400 | 2.14009200  | -1.82519800 |
| C | 6.46855800 | 0.71103100  | -0.40596200 |
| H | 7.44377900 | 0.32629800  | -0.11872600 |
| C | 5.33173100 | 0.19186000  | 0.17524800  |
| H | 5.43742200 | -0.60156300 | 0.90775900  |
| C | 4.03347800 | 0.66891800  | -0.17330300 |
| C | 2.81906100 | 0.16865400  | 0.40283600  |
| C | 2.84860900 | -0.94594800 | 1.42862600  |
| H | 3.74845500 | -0.88376000 | 2.05935300  |
| C | 2.84973600 | -2.31373600 | 0.72674500  |
| H | 1.90738800 | -2.47903900 | 0.19543800  |

|   |             |             |             |
|---|-------------|-------------|-------------|
| H | 3.02255600  | -3.14287400 | 1.41988600  |
| H | 3.65666500  | -2.32237900 | -0.01220200 |
| C | 1.91982900  | 0.38794400  | 3.26048700  |
| H | 1.01469400  | 0.58233600  | 3.83940100  |
| H | 2.17694900  | 1.27317000  | 2.67864100  |
| H | 2.74743600  | 0.15295600  | 3.94781500  |
| C | 1.41911600  | -1.95522600 | 3.18547200  |
| H | 2.33154700  | -2.21967300 | 3.74286300  |
| H | 1.10759700  | -2.79434200 | 2.56633100  |
| H | 0.60684700  | -1.73462700 | 3.87619700  |
| C | -1.25739900 | 0.21562300  | -2.19917600 |
| H | -1.38260500 | 1.08562300  | -2.84097700 |
| C | -0.76731600 | -0.89645000 | -2.78666200 |
| H | -0.53314000 | -0.78896000 | -3.84712800 |
| C | -0.45896300 | -2.23536900 | -2.26999200 |
| C | 0.37536400  | -3.05338000 | -3.05902100 |
| H | 0.75365300  | -2.66659600 | -4.00253900 |
| C | 0.73232500  | -4.33446000 | -2.64787700 |
| H | 1.38264200  | -4.94108800 | -3.27226100 |
| C | 0.24664200  | -4.83812700 | -1.43813200 |
| H | 0.51496600  | -5.84098600 | -1.11673100 |
| C | -0.59672400 | -4.05035600 | -0.65141700 |
| H | -0.99263300 | -4.43296900 | 0.28492200  |
| C | -0.94978400 | -2.76411500 | -1.05952000 |
| H | -1.63017000 | -2.20060600 | -0.43346900 |
| C | -3.39210100 | -0.07046900 | -0.25098600 |
| C | -4.02456500 | -0.83696200 | -1.23873500 |
| H | -3.48678400 | -1.11709800 | -2.13836300 |
| C | -5.35249400 | -1.24128200 | -1.07607800 |
| H | -5.82975200 | -1.83772900 | -1.84914400 |
| C | -6.05962800 | -0.87788700 | 0.06901400  |
| H | -7.09263200 | -1.19133200 | 0.19500100  |
| C | -5.43462500 | -0.11077000 | 1.05605400  |
| H | -5.97661400 | 0.16893400  | 1.95514900  |
| C | -4.10861300 | 0.28676600  | 0.90300700  |
| H | -3.62558200 | 0.85863300  | 1.68684800  |
| C | -1.92387000 | 2.36564800  | -0.42168500 |
| C | -2.78363800 | 2.98350800  | -1.34524900 |
| H | -3.29598100 | 2.38851900  | -2.09671000 |
| C | -3.00470800 | 4.35891000  | -1.29282700 |
| H | -3.67057100 | 4.82612500  | -2.01341600 |
| C | -2.38063900 | 5.13198300  | -0.30958000 |
| H | -2.55746700 | 6.20337600  | -0.26709800 |
| C | -1.53562700 | 4.52476100  | 0.61946700  |

|    |             |             |             |
|----|-------------|-------------|-------------|
| H  | -1.05064900 | 5.12000400  | 1.38828500  |
| C  | -1.30639400 | 3.14784400  | 0.56344400  |
| H  | -0.64137300 | 2.67348500  | 1.27966700  |
| Cl | -1.66305600 | -1.12261100 | 2.57173600  |
| N  | 1.66833300  | -0.75832500 | 2.34919900  |
| P  | -1.65639800 | 0.53826300  | -0.44675500 |
| Pd | 0.00240900  | -0.15838900 | 1.05083100  |



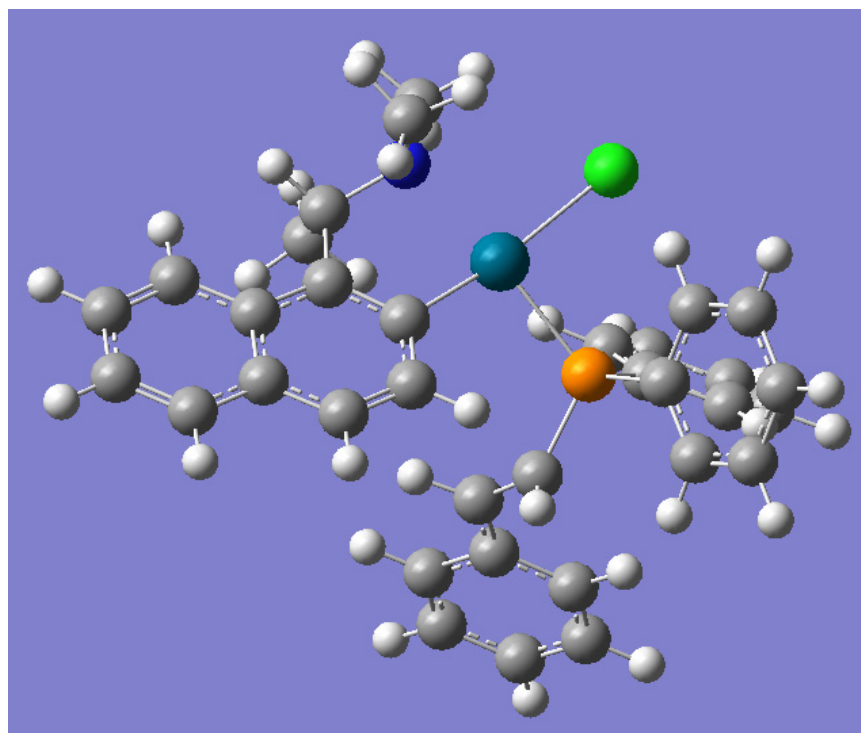

Transition state structure for TS-Ph-2

Imaginary frequencies:  $-808.3883 \text{ cm}^{-1}$

Gas phase energy:  $-2298.49779319 \text{ hartrees}$

Solvation ( $\text{CH}_2\text{Cl}_2$ ) energy:  $-2298.4898498 \text{ hartrees}$

Gibbs free energy:  $-2297.995251 \text{ hartrees}$

|   |            |             |             |
|---|------------|-------------|-------------|
| C | 1.67985100 | -0.77123900 | 0.54040500  |
| C | 1.81208100 | 0.15548300  | 1.61013600  |
| H | 0.92646800 | 0.53603000  | 2.10787600  |
| C | 3.04930900 | 0.56128400  | 2.05865500  |
| H | 3.12959700 | 1.26708600  | 2.88324400  |
| C | 4.23920300 | 0.07004800  | 1.46337100  |
| C | 5.52133800 | 0.50034900  | 1.89807900  |
| H | 5.57715000 | 1.23270600  | 2.70050000  |
| C | 6.67039200 | 0.00790900  | 1.32247900  |
| H | 7.64494600 | 0.34656400  | 1.66331300  |
| C | 6.57900300 | -0.94535700 | 0.28083700  |
| H | 7.48654500 | -1.33276400 | -0.17495100 |
| C | 5.35044200 | -1.38541500 | -0.16248500 |
| H | 5.31400500 | -2.11021300 | -0.96971300 |
| C | 4.13775700 | -0.89796200 | 0.40749700  |
| C | 2.83454800 | -1.31678700 | -0.01571100 |
| C | 2.64510100 | -2.37702200 | -1.08328500 |
| H | 3.47660200 | -3.09795300 | -1.07770400 |
| C | 2.57663900 | -1.73424400 | -2.47742500 |

|   |             |             |             |
|---|-------------|-------------|-------------|
| H | 1.68522400  | -1.10340100 | -2.56322000 |
| H | 2.57457300  | -2.47210200 | -3.28549600 |
| H | 3.45505800  | -1.09491200 | -2.60938000 |
| C | 1.65158100  | -4.02835100 | 0.43905400  |
| H | 0.70834500  | -4.48463000 | 0.74623200  |
| H | 2.05278900  | -3.43910000 | 1.26369800  |
| H | 2.37045200  | -4.81943900 | 0.17460700  |
| C | 0.92218300  | -4.00312700 | -1.84583900 |
| H | 1.71904100  | -4.69505100 | -2.16106600 |
| H | 0.61192700  | -3.38978000 | -2.69016800 |
| H | 0.05111500  | -4.56277800 | -1.50659300 |
| C | -0.63097200 | 1.82672100  | 0.29004700  |
| H | -0.39451100 | 2.24483100  | 1.27070300  |
| C | 0.06197300  | 2.35821000  | -0.87921900 |
| H | 1.08027900  | 1.99660300  | -1.04362900 |
| C | -0.43319100 | 3.33404000  | -1.78426300 |
| C | 0.38970000  | 3.78846200  | -2.85561300 |
| H | 1.38633200  | 3.36720600  | -2.96416400 |
| C | -0.05976400 | 4.75084800  | -3.74650000 |
| H | 0.58762400  | 5.08097100  | -4.55485900 |
| C | -1.34272900 | 5.30012600  | -3.60911700 |
| H | -1.69257800 | 6.05404600  | -4.30863600 |
| C | -2.17084200 | 4.86854700  | -2.56339800 |
| H | -3.16738300 | 5.28868300  | -2.45432600 |
| C | -1.73177800 | 3.90688900  | -1.66550900 |
| H | -2.38286100 | 3.57175000  | -0.86413300 |
| C | -2.74217300 | 0.39631900  | -1.01206100 |
| C | -2.41397000 | 0.11308100  | -2.34472200 |
| H | -1.43301700 | -0.28375600 | -2.58544100 |
| C | -3.35169500 | 0.31447100  | -3.35644500 |
| H | -3.08803600 | 0.08959700  | -4.38617300 |
| C | -4.62941500 | 0.78403000  | -3.04560000 |
| H | -5.36277700 | 0.92990600  | -3.83419700 |
| C | -4.96584200 | 1.05489900  | -1.71853100 |
| H | -5.96253500 | 1.40880100  | -1.46851500 |
| C | -4.02600200 | 0.86632400  | -0.70357900 |
| H | -4.30024400 | 1.07328500  | 0.32609500  |
| C | -2.32883400 | 0.14170400  | 1.90138200  |
| C | -2.67739400 | 1.30324500  | 2.61097800  |
| H | -2.44318600 | 2.28359400  | 2.20685000  |
| C | -3.33735200 | 1.21015900  | 3.83767800  |
| H | -3.59856400 | 2.11583600  | 4.37852500  |
| C | -3.66233200 | -0.04143600 | 4.36368900  |
| H | -4.17550600 | -0.11317200 | 5.31900300  |

|    |             |             |             |
|----|-------------|-------------|-------------|
| C  | -3.32998700 | -1.19964600 | 3.65781800  |
| H  | -3.58712700 | -2.17600200 | 4.05925200  |
| C  | -2.66395300 | -1.11424600 | 2.43456300  |
| H  | -2.41862400 | -2.01449700 | 1.87826600  |
| Cl | -2.00796700 | -3.00734400 | -0.62201300 |
| N  | 1.39601900  | -3.15133300 | -0.73190400 |
| P  | -1.45105500 | 0.20746300  | 0.28826700  |
| Pd | -0.04966400 | -1.61146500 | -0.11347900 |
